# Supplementary material
Source: PubMed Central journal article supplement (PMC10196932)

## Supplementary Online Content

Kinslow CJ, Mercurio A, Kumar P, et al. Association of *MGMT* promoter methylation with survival in low-grade and anaplastic gliomas after alkylating chemotherapy. *JAMA Oncol*. Published online May 18, 2023. doi:10.1001/jamaoncol.2023.0990

### Supplement 1. eMethods.

**eTable 1.** Review of Prospective Studies that Evaluated *MGMT* Promoter Methylation in Primary Low Grade and Anaplastic Gliomas

### eReferences.

**eTable 2.** Chemotherapy Regimens Used as First-Line Treatment

**eTable 3.** Patient Demographical and Clinical Characteristics in *IDH*-Wildtype Tumors

**eTable 4.** Patient Demographical and Clinical Characteristics in *IDH*-Mutant/Non-codeleted Tumors

**eTable 5.** Patient Demographical and Clinical Characteristics in *IDH*-Mutant/Codeleted Tumors

**eTable 6.** Univariable and Multivariable Analysis of Progression-Free Survival in All Patients That Received Chemotherapy

**eTable 7.** Univariable and Multivariable Analysis of Progression-Free Survival in *IDH*-Wildtype Patients That Received Chemotherapy

**eTable 8.** Univariable and Multivariable Analysis of Progression-Free Survival in *IDH*-Mutant/Non-codeleted Patients That Received Chemotherapy

**eTable 9.** Univariable and Multivariable Analysis of Progression-Free Survival in *IDH*-Mutant/Codeleted Patients That Received Chemotherapy

**eTable 10.** Univariable and Multivariable Analysis of Overall Survival in All Patients That Received Chemotherapy

**eTable 11.** Univariable and Multivariable Analysis of Overall Survival in *IDH*-Wildtype Patients That Received Chemotherapy

**eTable 12.** Univariable and Multivariable Analysis of Overall Survival in *IDH*-Mutant/Non-codeleted Patients That Received Chemotherapy

**eTable 13.** Univariable and Multivariable Analysis of Overall Survival in *IDH*-Mutant/Codeleted Patients That Received Chemotherapy

**eTable 14.** Summary of Univariable and Multivariable Subgroup Analyses in All Patients With Any First-Line Treatment

**Table 15.** Summary of Univariable and Multivariable Subgroup Analyses in Patients That Received No Chemotherapy During First-Line Treatment

**eTable 16.** Summary of Sensitivity Analysis of Univariable and Multivariable Subgroup Analyses in Patients That Received Chemotherapy

**eTable 17.** Univariable and Multivariable Analysis of Progression-Free Survival in Age 0 – 43 *IDH*-Wildtype Patients That Received Chemotherapy

**eTable 18.** Univariable and Multivariable Analysis of Progression-Free Survival in Age 44+ *IDH*-Wildtype Patients That Received Chemotherapy

**eTable 19.** Univariable and Multivariable Analysis of Progression-Free Survival in Grade III *IDH*-Wildtype Patients That Received Chemotherapy

**eTable 20.** Univariable and Multivariable Analysis of Progression-Free Survival in Grade II *IDH*-Mutant/Non-codeleted Patients That Received Chemotherapy

**eTable 21.** Univariable and Multivariable Analysis of Progression-Free Survival in Grade III *IDH*-Mutant/Non-codeleted Patients That Received Chemotherapy

**eTable 22.** Univariable and Multivariable Analysis of Overall Survival in *IDH*-Mutant/Codeleted Patients That Received Chemotherapy, Using  $P < .05$  as Threshold for Inclusion

**eTable 23.** Patient Demographic and Clinical Characteristics of *IDH*-Wildtype and *IDH*-Mutant/Codeleted Patients in the EORTC/CUIMC Cohorts

**eTable 24.** Univariable and Multivariable Analysis of Progression-Free Survival in Patients With *IDH*-Wildtype and *IDH*-Mutant/Codeleted Tumors That Received Chemotherapy in the EORTC/CUIMC Cohorts, Including Performance Status and Extent of Resection

**eTable 25.** Univariable and Multivariable Analysis of Progression-Free Survival in Patients With *IDH*-Wildtype and *IDH*-Mutant/Codeleted Tumors That Received No Chemotherapy in the EORTC/CUIMC Cohorts, Including Performance Status and Extent of Resection

**eTable 26.** Univariable and Multivariable Analysis of Overall Survival in Patients With *IDH*-Wildtype and *IDH*-Mutant/Codeleted Tumors That Received Chemotherapy in the EORTC/CUIMC Cohorts, Including Performance Status and Extent of Resection

**eTable 27.** Univariable and Multivariable Analysis of Overall Survival in Patients With IDH-Wildtype and IDH-Mutant/Codeleted Tumors That Received No Chemotherapy in the EORTC/CUIMC Cohorts, Including Performance Status and Extent of Resection

**eFigure 1.** Kaplan-Meier Curves for Progression-Free (A) and Overall (B) Survival Based on *MGMT* Promoter Methylation Status in All Patients, Regardless of Treatment Status

**eFigure 2.** Kaplan-Meier Curves for (A-D) Progression-Free Survival and (E-H) Overall Survival Based on *MGMT* Promoter Methylation Status in Patients That Did Not Receive Chemotherapy

**eFigure 3.** Schoenfeld Residual Plots of PFS for *MGMT* Status

**eFigure 4.** Schoenfeld Residual Plots of PFS for *MGMT* Status

**eFigure 5.** Kaplan-Meier Curves for Progression-Free Survival Based on *MGMT* Promoter Methylation Status in Patients That Received Chemotherapy

**eFigure 6.** Schoenfeld Residual Plots of OS for *MGMT* Status

**eFigure 7.** Schoenfeld Residual Plots of OS for *MGMT* Status

**eFigure 8.** Kaplan-Meier Curves Based on *MGMT* Promoter Status for Progression-Free Survival (A, B) and Overall Survival (C, D) in Patients With IDH-Wildtype or IDH-Mutant/Codeleted Tumors in the EORTC/CUIMC Cohorts

This supplementary material has been provided by the authors to give readers additional information about their work.

## **eMethods.**

### *Data Sources*

Jonsson et al.'s study<sup>1</sup> (hereafter referred to as MSK-IMPACT) was a prospective study conducted at Memorial Sloan-Kettering Cancer Center designed to integrate genomic data with clinical and treatment phenotypes to determine genetic aberrations that are associated with clinical behavior, evolution on therapy, or response to therapy. Primary and recurrent tumor samples from 923 adult patients underwent prospective genomic profiling during routine clinical care from 2013 to 2017.

EORTC 26951 was a randomized controlled trial designed by the European Organization of Research and Treatment of Cancer (EORTC) to evaluate the effectiveness of adjuvant alkylating chemotherapy in anaplastic oligodendroglial tumors.<sup>2</sup> Patients were eligible for this study if they were diagnosed with anaplastic oligodendroglioma or oligoastrocytoma (according to the 1993 WHO classification), age 16 – 70 years, had ECOG performance status 0 to 2, and had not received prior chemotherapy or radiotherapy. From 1996 through 2002, 368 patients were randomized to receive radiotherapy with or without procarbazine, lomustine, and vincristine (PCV). A post-hoc analysis of the trial showed that only 38% of tumors had 1p/19q codeletion and 51% had *IDH* mutation.<sup>3</sup> Thus, the majority of tumors in this study were not true molecular oligodendrogliomas, but rather represented a balance of all three molecular subtypes. Individualized patient data was obtained from a subsequent post-hoc analysis of the trial, designed to interrogate the prognostic and predictive value of CpG island hypermethylated phenotype and *MGMT* promoter methylation status.<sup>4</sup> One-hundred and fifteen patients from the original trial had samples that could be retrieved and were included in the study. A central

pathology review was conducted on all samples with available tissue according to the updated WHO 2007 classifications.

A third cohort was derived from Columbia University Irving Medical Center (CUIMC). Patients undergoing consultation in the Department of Radiation Oncology and expected to commence radiation therapy were prospectively enrolled to the Comprehensive Brain Malignancy, Brain Tumor and Brain Radiotherapy Clinical Database (IRB-AAAM2358). Clinical data was captured and entered by a research team from standard clinical sources including date of birth, gender, past medical history, clinical and pathological diagnosis, history of treatments including radiation therapy, surgery, chemotherapy, overall survival, recurrence, follow up visits, and lab results. Patients were consented from April 1<sup>st</sup>, 2013 to April 31<sup>st</sup>, 2022. Medical records were reviewed dating back to the earliest available.

#### *Variable Selection and Coding*

Clinical information obtained from MSK-IMPACT included patient age, sex, WHO 2016 integrated histological and molecular classification, tumor grade, *MGMT* promoter methylation status, date of initial diagnosis, date of patient death or last contact with hospital, surgical interventions, lines of systemic treatment and radiotherapy used, and date of first progression as determined by RANO criteria. Somatic mutations in *IDH1* or *IDH2* were determined via DNA sequencing with OncoKB annotation. 1p/19q codeletion status was determined using allele-specific or regional DNA copy number analysis inferred from DNA sequencing using MSK-IMPACT or FoundationOne, respectively. *MGMT* promoter methylation status was determined either by pyrosequencing or methylation-specific real-time PCR (MS-PCR). Borderline methylation of the promoter was deemed negative. The first line of chemotherapy was recorded

for each patient. Patients were coded as having received chemotherapy if treatment was initiated before progression and within one year of diagnosis, greater than six months before progression if within three years of diagnosis, greater than 12 months before progression if within six years of diagnosis, and greater than 24 months before progression if beyond five years of diagnosis. Receipt of radiotherapy was inferred if any of the subsequent surgical samples had received prior radiotherapy. Therefore, if no further surgeries were conducted, the patient was coded as “No Radiotherapy/Unknown”.

Clinical information obtained from EORTC 26951 included patient age, sex, reviewed histological diagnosis and grade, *IDH1* mutation status, 1p/19q loss of heterozygosity (LOH), *MGMT* promoter methylation status, extent of surgical resection, initial line of treatments, overall survival (OS) status and time, and progression-free survival (PFS) status and time, according to McDonald’s criteria.<sup>5</sup> Three samples did not have tissue available for central review and the original histological diagnosis and grade were used. Mutations in *IDH1* were determined by direct sequencing of the c.395G hotspot. 1p and 19q status were determined by fluorescent in situ hybridization (FISH). *MGMT* promoter methylation status was determined by MS-PCR using the *MGMT*-STP27 prediction model.<sup>6</sup> Methylation profiling was conducted using the Illumina Infinium HumanMethylation 27 or Infinium HumanMethylation 450 arrays. Two CpG sites within the *MGMT* promoter (cg12434587 and cg12981137) were used to identify the *MGMT* promoter status. Patients with 1p/19q LOH and unknown *IDH* status were assumed to be *IDH*-mutant, 1p/19q-codeleted.<sup>7,8</sup> *IDH2*, *ATRX*, and *TP53* status were not available in this cohort. Patients with discordant *IDH1* status and 1p19q status (ie. codeleted with *IDH1*wt) were analyzed as *IDH*-mutant/codeleted and then *IDH*-wildtype in a sensitivity analysis.<sup>7-9</sup>

In the CUIMC cohort, routine clinical information was obtained, as well as *IDH* status, 1p19q-codeletion, *MGMT* status, all lines of treatment, and dates of recurrence or death at follow-up. *IDH* status was determined at CUIMC via IHC staining for the IDH1 R132H hotspot mutation and/or by sequencing on the Columbia Solid Tumor Panel with the Illumina MiSeq platform, which includes *IDH1/2*. 1p19q-codeletion was determined via FISH probes for the 1p36 and 19q13 loci. *MGMT* promoter methylation was determined via MS-PCR. Additional markers, such as *ATRX* and *TP53* were used to discern cases with discordant *IDH* and 1p19q-codeletion status. Radiology and clinical reports were used to determine date of progression. Patients were censored once lost to follow-up. Death was determined via the electronic medical record, the social security death index, or other communications available to the research team. Patients who were transferred to hospice and lost to follow-up were considered to have had a clinical death.

eTable 1. Review of Prospective Studies that Evaluated *MGMT* Promoter Methylation in Primary Low Grade and Anaplastic Gliomas

| Study                            | Initial Study Design, Population, (Sample Size)                     | <i>MGMT</i> Study Design (Sample Size) Assay                                                                                                                                                                                                                                                                                                | Results                                                                                                                                                                                                                                                                                                                                                                                                                                                                                                                                                                                                                                                                                                                                                                                                                                                                                                                                                                                                                                                                                                                                                                                                                                                                                                                                                                                                                                                                                                                                                                                                                                                                                                                                                                                                                                                                                                         | Conclusion(s)                                                                                                                                                                                                                                                                                                                                                                                                                                                                                                                                                                                                                                                                                                                                                                               | Limitations                                                                                                                                                                                                                                                                                                                                                                                                  |
|----------------------------------|---------------------------------------------------------------------|---------------------------------------------------------------------------------------------------------------------------------------------------------------------------------------------------------------------------------------------------------------------------------------------------------------------------------------------|-----------------------------------------------------------------------------------------------------------------------------------------------------------------------------------------------------------------------------------------------------------------------------------------------------------------------------------------------------------------------------------------------------------------------------------------------------------------------------------------------------------------------------------------------------------------------------------------------------------------------------------------------------------------------------------------------------------------------------------------------------------------------------------------------------------------------------------------------------------------------------------------------------------------------------------------------------------------------------------------------------------------------------------------------------------------------------------------------------------------------------------------------------------------------------------------------------------------------------------------------------------------------------------------------------------------------------------------------------------------------------------------------------------------------------------------------------------------------------------------------------------------------------------------------------------------------------------------------------------------------------------------------------------------------------------------------------------------------------------------------------------------------------------------------------------------------------------------------------------------------------------------------------------------|---------------------------------------------------------------------------------------------------------------------------------------------------------------------------------------------------------------------------------------------------------------------------------------------------------------------------------------------------------------------------------------------------------------------------------------------------------------------------------------------------------------------------------------------------------------------------------------------------------------------------------------------------------------------------------------------------------------------------------------------------------------------------------------------|--------------------------------------------------------------------------------------------------------------------------------------------------------------------------------------------------------------------------------------------------------------------------------------------------------------------------------------------------------------------------------------------------------------|
| EORTC 26951 <sup>2-4,10-14</sup> | RCT <sup>2</sup><br>RT alone vs. RT + PCV<br>AO or AOA<br>(n = 368) | 1. Post-hoc <sup>10</sup><br>(n = 152)<br>MS-MLPA<br>2. Post-hoc <sup>11</sup><br>(n = 151)<br>MS-MLPA<br>3. Post-hoc <sup>14</sup><br>(n = 183<br>[n = 150 with <i>MGMT</i> , <i>IDH</i> , 1p/19q status])<br>MS-MLPA<br>4. Post-hoc <sup>4</sup><br>(n = 115)<br>MS-PCR (STP27)<br>5. Post-hoc <sup>3</sup><br>(n = 78)<br>MS-PCR (STP27) | 1. - MVA HR of <i>mMGMT</i> for PFS and OS was 0.28 (0.13 – 0.60) and 0.24 (0.10 – 0.56), respectively.<br>- UVA HR of <i>mMGMT</i> for PFS in RT/PCV and RT arms was 0.35 (p = .001) and 0.46 (p = .01), respectively.<br>- In RT group, PFS and OS for <i>uMGMT</i> vs <i>mMGMT</i> was 7.8 vs 17.9 (p = .01) and 12.3 and 59.3 months (p = .002), respectively. In RT/PCV group, PFS and OS for unmethylated vs methylated was 10.5 vs 49.0 months (p = .001) and 19.0 and NR (p = .0004), respectively.<br>2. <i>MGMT</i> methylation not included in final MVA with stepwise selection.<br>3. - PFS and OS for <i>uMGMT</i> vs. <i>mMGMT</i> was 7.9 (5.7 – 9.8) vs. 33.0 (17.6 – 47.1) and 15.9 (11.6 – 19.0) vs. 59.3 (36.9 – 73.6) months, respectively.<br>- <i>MGMT</i> not independently significant in MVA model with <i>IDH</i> and 1p/19q status.<br>- UVA HR of RT/PCV for PFS was 0.52 (0.35 – 0.76) and 0.63 (0.34 – 1.16) in <i>mMGMT</i> vs. <i>uMGMT</i> groups, respectively. UVA HR of RT/PCV for OS was 0.65 (0.43 – 0.98) and 0.81 (0.44 – 1.49) in <i>mMGMT</i> vs. <i>uMGMT</i> groups, respectively.<br>4. - UVA HR of <i>mMGMT</i> for PFS and OS was 0.27 (p < .001) and 0.26 (p < .001), respectively.<br>- MVA HR of <i>mMGMT</i> for PFS and OS was no longer significant (1.00 [p = .99] and 0.88 [p = .68], respectively).<br>- UVA HR of RT/PCV for PFS was 0.30 (p < .0001) and 0.95 (p = .91) in <i>mMGMT</i> vs. <i>uMGMT</i> groups, respectively.<br>- UVA HR of RT/PCV for OS was 0.33 (p = .0001) and 1.16 (p = .26) in <i>mMGMT</i> vs. <i>uMGMT</i> groups, respectively. Interaction was highly significant (p = .003).<br>5. - UVA HR of <i>mMGMT</i> for OS in <i>IDH</i> -wt was 0.57 (0.29 – 1.1).<br>- UVA HR of RT/PCV for OS was 0.39 (0.21 – 0.74) and 1.35 (0.54 – 3.34) in <i>mMGMT</i> vs. <i>uMGMT</i> groups, respectively (p of interaction = .025). | 1. <i>MGMT</i> is prognostic but not predictive of outcomes for anaplastic oligodendroglial tumors treated with PCV.<br>2. After accounting for <i>IDH</i> status, independent prognostic significance of <i>MGMT</i> methylation is lost.<br>3. Patients with <i>mMGMT</i> seemed to derive more benefit from PCV. <i>mMGMT</i> is the result of genome-wide methylation, and the prognostic impact reflects improved outcomes of <i>IDH</i> -mutated tumors.<br>4. <i>MGMT</i> promoter methylation is prognostic in AOD and predictive of response to PCV chemotherapy. Some methylation sites within the <i>MGMT</i> promoter region have less predictive power than others.<br>5. <i>mMGMT</i> is the single most important predictive molecular factor for benefit from chemotherapy. | 1. <i>IDH</i> status not available<br>2. Exploratory analysis with 12 clinical and molecular features that may have been underpowered<br>3. <i>MGMT</i> unmethylated status was rare (2 cases in 71) in <i>IDH</i> mutant tumors.<br>4. -Cohort was relatively modest in size.<br>- Presence of severe multicollinearity in MVA.<br>5. No MVA was conducted. 95% of <i>IDH</i> -mt tumors had <i>mMGMT</i> . |
| Brandes et al. <sup>15</sup>     | Prospective <sup>1</sup><br>5<br>AO or AOA<br>TMZ<br>(n = 67)       | Prospective <sup>15</sup><br>(n = 37)<br>MS-PCR                                                                                                                                                                                                                                                                                             | - Response rate 54 vs. 41% in <i>mMGMT</i> vs. <i>uMGMT</i> tumors (p = .23), respectively.<br>- PFS 12 vs. 13 months in <i>mMGMT</i> vs. <i>uMGMT</i> tumors (p = .41), respectively.<br>- OS 41 vs. 29 months in <i>mMGMT</i> vs. <i>uMGMT</i> tumors (p = .09), respectively.                                                                                                                                                                                                                                                                                                                                                                                                                                                                                                                                                                                                                                                                                                                                                                                                                                                                                                                                                                                                                                                                                                                                                                                                                                                                                                                                                                                                                                                                                                                                                                                                                                | <i>mMGMT</i> not independent prognostic factor for AO/AOA on TMZ. <i>mMGMT</i> more common with 1p/19q-codeletion.                                                                                                                                                                                                                                                                                                                                                                                                                                                                                                                                                                                                                                                                          | Small sample size. Prognostic implication of <i>MGMT</i> status not examined according to 1p/19q status.                                                                                                                                                                                                                                                                                                     |
| Mikkelsen et al. <sup>16</sup>   | Prospective <sup>1</sup><br>6<br>AO or AOA<br>TMZ                   | Prospective <sup>16</sup><br>(n = 24)<br>MS-PCR                                                                                                                                                                                                                                                                                             | 12-month PFS for <i>mMGMT</i> vs. <i>uMGMT</i> tumors was 69.2 vs. 63.6% (p = 0.73).                                                                                                                                                                                                                                                                                                                                                                                                                                                                                                                                                                                                                                                                                                                                                                                                                                                                                                                                                                                                                                                                                                                                                                                                                                                                                                                                                                                                                                                                                                                                                                                                                                                                                                                                                                                                                            | <i>MGMT</i> methylation more common with 1p/19q-codeletion.                                                                                                                                                                                                                                                                                                                                                                                                                                                                                                                                                                                                                                                                                                                                 | Small sample size. Prognostic implication of <i>MGMT</i> status not                                                                                                                                                                                                                                                                                                                                          |

|                           |                                                                                         |                                                                                                                                                                |                                                                                                                                                                                                                                                                                                                                                                                                                                                                                                                                                                                                                                                                                                                                                                                                                                                                                                                                                                                                                                                                                                                                                                     |                                                                                                                                                                                                                                                                                                                                                                                                                                                                                                                                        |                                                                                                                                                                                                                                                                                                                                                                                      |
|---------------------------|-----------------------------------------------------------------------------------------|----------------------------------------------------------------------------------------------------------------------------------------------------------------|---------------------------------------------------------------------------------------------------------------------------------------------------------------------------------------------------------------------------------------------------------------------------------------------------------------------------------------------------------------------------------------------------------------------------------------------------------------------------------------------------------------------------------------------------------------------------------------------------------------------------------------------------------------------------------------------------------------------------------------------------------------------------------------------------------------------------------------------------------------------------------------------------------------------------------------------------------------------------------------------------------------------------------------------------------------------------------------------------------------------------------------------------------------------|----------------------------------------------------------------------------------------------------------------------------------------------------------------------------------------------------------------------------------------------------------------------------------------------------------------------------------------------------------------------------------------------------------------------------------------------------------------------------------------------------------------------------------------|--------------------------------------------------------------------------------------------------------------------------------------------------------------------------------------------------------------------------------------------------------------------------------------------------------------------------------------------------------------------------------------|
|                           | (n = 48)                                                                                |                                                                                                                                                                |                                                                                                                                                                                                                                                                                                                                                                                                                                                                                                                                                                                                                                                                                                                                                                                                                                                                                                                                                                                                                                                                                                                                                                     |                                                                                                                                                                                                                                                                                                                                                                                                                                                                                                                                        | examined according to 1p/19q status.                                                                                                                                                                                                                                                                                                                                                 |
| Gan et al. <sup>17</sup>  | Prospective <sup>17</sup><br>7<br>AO or AOA<br>TMZ<br>(n = 40)                          | Prospective <sup>17</sup><br>(n = 21)<br>SSE or MS-<br>HRM                                                                                                     | - Objective response 70 vs. 27% (p = 0.09) in MGMT mMGMT vs. uMGMT tumors.<br>- No difference in PFS or OS with MGMT methylation: UVA HR 1.30 (0.30 – 5.58) and 1.80 (0.55-5.88), respectively.                                                                                                                                                                                                                                                                                                                                                                                                                                                                                                                                                                                                                                                                                                                                                                                                                                                                                                                                                                     | MGMT methylated tumors have higher response rates to TMZ.                                                                                                                                                                                                                                                                                                                                                                                                                                                                              | Small sample size. All 1p/19q-codeleted tumors were MGMT methylated.                                                                                                                                                                                                                                                                                                                 |
| NOA-04 <sup>18-20</sup>   | RCT <sup>18</sup><br>RT vs. PCV<br>vs. TMZ<br>AG<br>(n = 318)                           | 1.<br>Prospective <sup>18</sup><br>(n = 176)<br>MS-PCR<br>2. Post-hoc <sup>19</sup><br>(n = 183)<br>MS-PCR<br>3. Post-hoc <sup>20</sup><br>(n = 198)<br>MS-PCR | 1. - UVA HR of uMGMT for TTF and PFS was 2.4 (p < .0001) and 2.0 (p < .0001), respectively.<br>- MVA HR of uMGMT for TTF and PFS was 1.9 (p = .02) and 1.7 (p = .02), respectively.<br>- UVA HR of uMGMT for PFS in chemotherapy and RT arms was 2.0 (p < .03) and 2.7 (p < .003), respectively.<br>2. - PFS for mMGMT vs. uMGMT tumors 41.6 vs 16.9 months (p < 0.0001).<br>- PFS for mMGMT vs. uMGMT in IDH-mt tumors treated with RT and chemotherapy was 36.8 (34.4 – NR) vs. 28.0 (10.9 – NR) and 44.7 (34.7 – NR) vs. 28.1 (7.4 – NR), respectively.<br>- PFS for mMGMT vs. uMGMT in IDH-wt tumors treated with RT and chemotherapy was 16.3 vs. 17.2 (p = 0.33) and 27.2 vs 9.1 (p = .02), respectively.<br>- MVA shows interaction between MGMT and therapy in IDH-wt (p = 0.001) but not IDH-mutant (p = .70) tumors.<br>3. -PFS for mMGMT vs. uMGMT in IDH-wt tumors that received RT and chemotherapy was 1.35 vs. 0.79 (p = 0.11) and 2.73 vs. 0.71 (p = 0.0034) years, respectively.<br>-PFS for mMGMT vs. uMGMT in IDH-mutant tumors that received RT and chemotherapy was 4.22 vs. 4.84 (p = 0.67) and 3.63 vs. 1.51 (p = 0.62) years, respectively. | 1. MGMT promoter methylation is prognostic in anaplastic gliomas but not predictive of response to chemotherapy. MGMT may be a prognostic marker for good outcome in patients treated with any type of genotoxic therapy or predictive for response to RT.<br>2. MGMT is prognostic in patients with anaplastic IDH-mt gliomas and predictive of response to alkylating chemotherapy in patients with IDH-wt tumors.<br>3. MGMT methylation is a predictive biomarker for benefit from alkylating chemotherapy in IDH-wt gliomas only. | 1. Chemotherapy did not improve TTF, PFS, OS in any group.<br>2. MGMT status was not examined separately in IDH-mt 1p/19q-non-codeleted vs -codeleted tumors.<br>3. Unmethylated MGMT was rare in IDH-mt subgroup. IDH-mt subgroup not stratified by 1p/19q status. Mature data for prognostic implication of MGMT in IDH-mt tumors contradicts earlier report and is not addressed. |
| GGN <sup>21</sup>         | Prospective <sup>2</sup><br><sup>1</sup> Data<br>Collection<br>Glioma/<br>GBM           | 1. Post-hoc <sup>21</sup><br>GGN/NOA-04<br>(n = 105)<br>AA<br>MS-PCR<br>2. Post-hoc <sup>19</sup><br>GGN/NOA-08<br>AG<br>(n = 109)<br>MS-PCR                   | 1. OS in mMGMT vs. uMGMT AA approximately 63 vs. 33 months, respectively (no p-value provided). MVA of OS shows RR of death with uMGMT is 1.3 (no p-value) in AA.<br>2. PFS for mMGMT vs. uMGMT IDH-wt tumors treated with RT and chemotherapy was 5.3 vs. 9.3 (p = 0.60) and 15.8 vs 3.4 (p = .02), respectively. UVA and MVA of interaction was p = 0.04 and NS, respectively.                                                                                                                                                                                                                                                                                                                                                                                                                                                                                                                                                                                                                                                                                                                                                                                    | 1. MGMT promoter status greater prognostic effect in GBM than AA. MGMT is prognostic in IDH-mt AA but not IDH-wt AA.<br>2. MGMT status is predictive of response to chemotherapy in IDH-wt patients.                                                                                                                                                                                                                                                                                                                                   | 1. IDH and 1p/19q status not reported in AA subgroup.<br>2. Few cases of IDH-mt MGMT without methylation.                                                                                                                                                                                                                                                                            |
| RTOG BR0131 <sup>22</sup> | Prospective <sup>2</sup><br><sup>3</sup><br>AO or AOA<br>TMZ -><br>TMZ + RT<br>(n = 40) | Prospective <sup>23</sup><br>(n = 21)<br>MS-PCR                                                                                                                | 6-month PFS 100 vs. 100% for methylated vs. unmethylated tumors                                                                                                                                                                                                                                                                                                                                                                                                                                                                                                                                                                                                                                                                                                                                                                                                                                                                                                                                                                                                                                                                                                     | N/A                                                                                                                                                                                                                                                                                                                                                                                                                                                                                                                                    | Small sample size. Prognostic implication of MGMT status not examined according to 1p/19q status.                                                                                                                                                                                                                                                                                    |



|                                 |                                                                                                                                                |                                                                                                                                                                                                                                                              |                                                                                                                                                                                                                                                                                                                                                                                                                                                                                                                                                                                                                                                                                                                                                                                                                                                                                                                                                                                                                                                                                                                                                                                                                                                                                                                                                     |                                                                                                                                                                                                                                                                                                                                                                                                                                                                                                                                                                         |                                                                                                                                                                                                                                                                                                                                                 |
|---------------------------------|------------------------------------------------------------------------------------------------------------------------------------------------|--------------------------------------------------------------------------------------------------------------------------------------------------------------------------------------------------------------------------------------------------------------|-----------------------------------------------------------------------------------------------------------------------------------------------------------------------------------------------------------------------------------------------------------------------------------------------------------------------------------------------------------------------------------------------------------------------------------------------------------------------------------------------------------------------------------------------------------------------------------------------------------------------------------------------------------------------------------------------------------------------------------------------------------------------------------------------------------------------------------------------------------------------------------------------------------------------------------------------------------------------------------------------------------------------------------------------------------------------------------------------------------------------------------------------------------------------------------------------------------------------------------------------------------------------------------------------------------------------------------------------------|-------------------------------------------------------------------------------------------------------------------------------------------------------------------------------------------------------------------------------------------------------------------------------------------------------------------------------------------------------------------------------------------------------------------------------------------------------------------------------------------------------------------------------------------------------------------------|-------------------------------------------------------------------------------------------------------------------------------------------------------------------------------------------------------------------------------------------------------------------------------------------------------------------------------------------------|
| EORTC 22033-26033 <sup>24</sup> | RCT<br>RT vs. TMZ<br>High-risk<br>LGG<br>(n = 477) <sup>24</sup>                                                                               | Prospective <sup>24</sup><br>(n = 150)<br>MS-PCR<br>(STP27)                                                                                                                                                                                                  | <i>MGMT</i> promoter methylated in almost all <i>IDH</i> -mt tumors and half of <i>IDH</i> -wt tumors. The rarity of <i>IDH</i> -wt tumors did not allow for statistical testing.                                                                                                                                                                                                                                                                                                                                                                                                                                                                                                                                                                                                                                                                                                                                                                                                                                                                                                                                                                                                                                                                                                                                                                   | 1. <i>MGMT</i> does not provide prognostic or predictive value in <i>IDH</i> -mt tumors.                                                                                                                                                                                                                                                                                                                                                                                                                                                                                | Sample size prevented statistic testing from being performed.                                                                                                                                                                                                                                                                                   |
| RTOG 0424 <sup>25,26</sup>      | Prospective <sup>25</sup><br>TMZ + RT<br>High-risk<br>LGG<br>(n = 129)                                                                         | Prospective <sup>26</sup><br>(n = 75)<br>MS-PCR<br>(STP27)<br>Prospective <sup>27</sup><br>(n = 76)<br>MS-PCR<br>(STP27)                                                                                                                                     | 1. - UVA HR of <i>uMGMT</i> was 3.52 (P < .001) and 3.06 (P < .001) for OS and PFS, respectively.<br>- MVA HR of <i>uMGMT</i> was 2.70 (P < .05) and 2.74 (p = .02) for OS and PFS, respectively.<br>- Median OS and PFS for <i>mMGMT</i> vs. <i>uMGMT</i> in <i>IDH</i> -wt was approximately NR vs. 27 months (no p-value) and 54 vs. 24 months (no p-value), respectively.<br>2. - UVA HR of <i>mMGMT</i> was 0.31 (P < .001) and 0.39 (P = .001) for OS and PFS, respectively.<br>- MVA HR of <i>mMGMT</i> was 0.65 (P = .42) and 0.63 (p = .36) for OS and PFS, respectively, in multi-marker analysis that included <i>IDH</i> and 1p/19q status.                                                                                                                                                                                                                                                                                                                                                                                                                                                                                                                                                                                                                                                                                             | 1. <i>MGMT</i> promoter methylation is an independent prognostic biomarker of high-risk, low-grade glioma treated with temozolomide and radiotherapy.<br>2. <i>MGMT</i> promoter methylation is a highly significant biomarker of OS and PFS but did not retain significance in multi-marker MVA.                                                                                                                                                                                                                                                                       | 1. 1p/19q status was not accounted for. No formal statistics conducted in <i>IDH</i> -wt subgroup. No analysis of <i>IDH</i> -mt subgroup.<br>2. Small sample size and/or dependency of <i>mMGMT</i> on <i>IDH</i> -mt.                                                                                                                         |
| RTOG 9802 <sup>28,29</sup>      | RCT <sup>28</sup><br>RT vs.<br>RT + PCV<br>High-risk<br>LGG<br>(n = 251)                                                                       | Post-hoc <sup>29</sup><br>(n = 71)<br>MS-PCR<br>(STP27)                                                                                                                                                                                                      | - UVA HR of <i>uMGMT</i> for PFS and OS was 1.65 (p = 0.09) and 1.83 (p = .06), respectively.<br>- MVA HR of <i>uMGMT</i> for PFS and OS was 0.95 (p = 0.89) and 0.95 (p = .90), respectively.                                                                                                                                                                                                                                                                                                                                                                                                                                                                                                                                                                                                                                                                                                                                                                                                                                                                                                                                                                                                                                                                                                                                                      | <i>MGMT</i> status may have not held statistical significance because it is associated with histological subgroups.                                                                                                                                                                                                                                                                                                                                                                                                                                                     | 1p/19q status not included in MVA. <i>MGMT</i> analysis not conducted in individual molecular subgroups. Sample size may be too small.                                                                                                                                                                                                          |
| CATNON <sup>30-33</sup>         | RCT <sup>30</sup><br>RT vs.<br>RT + adj.<br>TMZ<br>vs.<br>RT + conc.<br>TMZ<br>vs. RT +<br>adj./conc.<br>TMZ<br>AG, non-<br>codel<br>(n = 751) | 1. Prospective <sup>30</sup><br>MS-PCR<br>(n = 550)<br>2.<br>Prospective <sup>31</sup><br>MS-PCR<br>(STP27)<br>(n = 663)<br>3.<br>Prospective <sup>32</sup><br>MS-PCR<br>(STP27)<br>(n = 654)<br>4. Post-Hoc <sup>33</sup><br>MS-PCR<br>(STP27)<br>(n = 152) | 1. MVA HR of <i>mMGMT</i> for OS was 0.49 (p = 0.003).<br>2. - MVA HR of <i>mMGMT</i> for OS was 0.57 (p = 0.002) and 0.54 (p = 0.0009) when stratified by conc. and adj. TMZ, respectively (not adjusted for <i>IDH</i> status).<br>- In <i>IDH</i> -wt, UVA HR for <i>uMGMT</i> /No conc. TMZ, <i>uMGMT</i> /conc. TMZ, <i>mMGMT</i> /No conc. TMZ, <i>mMGMT</i> /conc. TMZ was 1.00, 1.19 (0.83 - 1.71), 0.83 (0.55 - 1.26), and 0.68 (0.42 - 1.08), p = 0.08.<br>- In <i>IDH</i> -wt, UVA HR for <i>uMGMT</i> /No adj. TMZ, <i>uMGMT</i> /adj. TMZ, <i>mMGMT</i> /No adj. TMZ, <i>mMGMT</i> /adj. TMZ was 1.00, 0.92 (0.64 - 1.33), 0.69 (0.45 - 1.05), and 0.66 (0.42 - 1.03), p = 0.15.<br>- P-value of interaction between <i>MGMT</i> status and conc. TMZ, adj. TMZ, any TMZ was 0.23, 0.92, and 0.86, respectively.<br>3. UVA of <i>mMGMT</i> not associated with OS in <i>IDH</i> -mt non-codel patients (HR 0.92, p = 0.7)<br>4. - <i>mMGMT</i> associated with improved OS (HR 0.65 [0.45 - 0.92] but not PFS [0.95 [0.68 - 1.34]] in <i>IDH</i> -wt tumors.<br>- No survival benefit of TMZ on OS in <i>mMGMT</i> (HR 1.36 [0.75 - 2.48]) or <i>uMGMT</i> tumors (0.88 [0.54 - 1.42]) in <i>IDH</i> -wt tumors.<br>- No survival benefit of TMZ on PFS in <i>mMGMT</i> or <i>uMGMT</i> tumors (no HR given) in <i>IDH</i> -wt tumors. | 1. Ongoing molecular research within this trial will reveal if <i>MGMT</i> is predictive for benefit from TMZ.<br>2. Unlike <i>mMGMT</i> GBM, <i>mMGMT</i> <i>IDH</i> -wt gliomas do not show benefit from TMZ. Further molecular analysis is required to establish the role of <i>MGMT</i> promoter methylation in <i>IDH</i> -wt tumors.<br>3. <i>MGMT</i> not prognostic in <i>IDH</i> -mt non-codel patients.<br>4. A well-powered prospective study on the effectiveness of TMZ is warranted in tumors meeting the contemporary definition of GBM, <i>IDH</i> -wt. | 1. <i>MGMT</i> assay was optimized for GBM. <i>MGMT</i> analysis not stratified by <i>IDH</i> status.<br>2. <i>MGMT</i> analysis not conducted in <i>IDH</i> -mt tumors. <i>IDH</i> -wt tumors did not benefit for conc. or adj. TMZ.<br>3. <i>MGMT</i> prognostic implication not stratified by treatment.<br>4. Post-hoc, underpowered study. |
| Qui et al. <sup>34</sup>        | RCT <sup>34</sup><br>RT vs. RT +<br>TMZ                                                                                                        | 1.<br>Prospective <sup>34</sup><br>Pyrosequencing<br>(n = 37)                                                                                                                                                                                                | - Median OS 24 vs. 24 months (p = .268)                                                                                                                                                                                                                                                                                                                                                                                                                                                                                                                                                                                                                                                                                                                                                                                                                                                                                                                                                                                                                                                                                                                                                                                                                                                                                                             | Limited sample size precluded subgroup analysis. The predictive value of <i>mMGMT</i> deserves further investigation.                                                                                                                                                                                                                                                                                                                                                                                                                                                   | Limited sample size.                                                                                                                                                                                                                                                                                                                            |

|  |                                                     |  |  |  |  |
|--|-----------------------------------------------------|--|--|--|--|
|  | G2-3 <i>IDH</i> -wt<br>with TERT-<br>mt<br>(n = 37) |  |  |  |  |
|--|-----------------------------------------------------|--|--|--|--|

95% confidence intervals are displayed in parentheses next to the corresponding HR, where applicable.

Abbreviations:

- RCT- randomized controlled trial
- MS-MLPA- methylation-specific multiplex ligation-dependent probe amplification
- MS-PCR- methylation-specific polymerase chain reaction
- UVA- univariable analysis
- MVA- multivariable analysis
- HR- hazard ratio
- AO- anaplastic oligodendroglioma
- AOA- anaplastic oligoastrocytoma
- AA- anaplastic astrocytoma
- GBM- glioblastoma
- LGG- low-grade glioma
- AG- anaplastic glioma
- TTF- time to treatment failure
- PFS- progression-free survival
- OS- overall survival
- NR- not reached
- NS- not significant
- Wt- wild type
- Mt- mutant
- RT- radiotherapy
- PCV- procarbazine, lomustine, and vincristine
- TMZ- temozolomide
- SSE- Sequenom Standard Epipanel
- MS- HRM- methylation-sensitive high-resolution melting
- Adj.- adjuvant
- Conc.- Concurrent
- Codel- 1p/19q-codeleted
- u*MGMT*- unmethylated *MGMT*
- m*MGMT*- methylated *MGMT*
- GGN- German Glioma Network
- EORTC- European Organization of Research and Treatment of Cancer
- RTOG- Radiation Therapy Oncology Group

NOA- Neurooncology Working Group of the German Cancer Society

#### eReferences.

1. Jonsson P, Lin AL, Young RJ, et al. Genomic Correlates of Disease Progression and Treatment Response in Prospectively Characterized Gliomas. *Clinical Cancer Research*. 2019;25(18):5537.
2. van den Bent MJ, Carpentier AF, Brandes AA, et al. Adjuvant Procarbazine, Lomustine, and Vincristine Improves Progression-Free Survival but Not Overall Survival in Newly Diagnosed Anaplastic Oligodendrogliomas and Oligoastrocytomas: A Randomized European Organisation for Research and Treatment of Cancer Phase III Trial. *Journal of Clinical Oncology*. 2006;24(18):2715-2722.
3. Dubbink HJ, Atmodimedjo PN, Kros JM, et al. Molecular classification of anaplastic oligodendroglioma using next-generation sequencing: a report of the prospective randomized EORTC Brain Tumor Group 26951 phase III trial. *Neuro Oncol*. 2015;18(3):388-400.
4. van den Bent MJ, Erdem-Eraslan L, Idbaih A, et al. MGMT-*STP27* Methylation Status as Predictive Marker for Response to PCV in Anaplastic Oligodendrogliomas and Oligoastrocytomas. A Report from EORTC Study 26951. *Clinical Cancer Research*. 2013;19(19):5513.
5. Macdonald DR, Cascino TL, Schold SC, Jr., Cairncross JG. Response criteria for phase II studies of supratentorial malignant glioma. *Journal of clinical oncology : official journal of the American Society of Clinical Oncology*. 1990;8(7):1277-1280.
6. Bady P, Sciuscio D, Diserens AC, et al. MGMT methylation analysis of glioblastoma on the Infinium methylation BeadChip identifies two distinct CpG regions associated with gene silencing and outcome, yielding a prediction model for comparisons across datasets, tumor grades, and CIMP-status. *Acta Neuropathol*. 2012;124(4):547-560.
7. Yan H, Parsons DW, Jin G, et al. IDH1 and IDH2 mutations in gliomas. *N Engl J Med*. 2009;360(8):765-773.
8. Labussière M, Idbaih A, Wang XW, et al. All the 1p19q codeleted gliomas are mutated on *IDH1* or *IDH2*. *Neurology*. 2010;74(23):1886.
9. Ball MK, Kollmeyer TM, Praska CE, et al. Frequency of false-positive FISH 1p/19q codeletion in adult diffuse astrocytic gliomas. *Neuro-Oncology Advances*. 2020;2(1):vdaa109.
10. van den Bent MJ, Dubbink HJ, Sanson M, et al. MGMT promoter methylation is prognostic but not predictive for outcome to adjuvant PCV chemotherapy in anaplastic oligodendroglial tumors: a report from EORTC Brain Tumor Group Study 26951. *Journal of clinical oncology : official journal of the American Society of Clinical Oncology*. 2009;27(35):5881-5886.
11. van den Bent MJ, Dubbink HJ, Marie Y, et al. IDH1 and IDH2 Mutations Are Prognostic but not Predictive for Outcome in Anaplastic Oligodendroglial Tumors: A Report of the European Organization for Research and Treatment of Cancer Brain Tumor Group. *Clinical Cancer Research*. 2010;16(5):1597.
12. van den Bent MJ, Gravendeel LA, Gorlia T, et al. A hypermethylated phenotype is a better predictor of survival than MGMT methylation in anaplastic oligodendroglial brain tumors: a report from EORTC study 26951. *Clinical cancer research : an official journal of the American Association for Cancer Research*. 2011;17(22):7148-7155.

13. Erdem-Eraslan L, Gravendeel LA, de Rooi J, et al. Intrinsic Molecular Subtypes of Glioma Are Prognostic and Predict Benefit From Adjuvant Procarbazine, Lomustine, and Vincristine Chemotherapy in Combination With Other Prognostic Factors in Anaplastic Oligodendroglial Brain Tumors: A Report From EORTC Study 26951. *Journal of Clinical Oncology*. 2012;31(3):328-336.
14. van den Bent MJ, Brandes AA, Taphoorn MJB, et al. Adjuvant Procarbazine, Lomustine, and Vincristine Chemotherapy in Newly Diagnosed Anaplastic Oligodendroglioma: Long-Term Follow-Up of EORTC Brain Tumor Group Study 26951. *Journal of Clinical Oncology*. 2012;31(3):344-350.
15. Brandes AA, Tosoni A, Cavallo G, et al. Correlations Between O6-Methylguanine DNA Methyltransferase Promoter Methylation Status, 1p and 19q Deletions, and Response to Temozolomide in Anaplastic and Recurrent Oligodendroglioma: A Prospective GICNO Study. *Journal of Clinical Oncology*. 2006;24(29):4746-4753.
16. Mikkelsen T, Doyle T, Anderson J, et al. Temozolomide single-agent chemotherapy for newly diagnosed anaplastic oligodendroglioma. *Journal of Neuro-Oncology*. 2009;92(1):57-63.
17. Gan HK, Rosenthal MA, Dowling A, et al. A phase II trial of primary temozolomide in patients with grade III oligodendroglial brain tumors. *Neuro Oncol*. 2010;12(5):500-507.
18. Wick W, Hartmann C, Engel C, et al. NOA-04 Randomized Phase III Trial of Sequential Radiochemotherapy of Anaplastic Glioma With Procarbazine, Lomustine, and Vincristine or Temozolomide. *Journal of Clinical Oncology*. 2009;27(35):5874-5880.
19. Wick W, Meisner C, Hentschel B, et al. Prognostic or predictive value of *MGMT* promoter methylation in gliomas depends on *IDH1* mutation. *Neurology*. 2013;81(17):1515.
20. Wick W, Roth P, Hartmann C, et al. Long-term analysis of the NOA-04 randomized phase III trial of sequential radiochemotherapy of anaplastic glioma with PCV or temozolomide. *Neuro Oncol*. 2016;18(11):1529-1537.
21. Hartmann C, Hentschel B, Wick W, et al. Patients with *IDH1* wild type anaplastic astrocytomas exhibit worse prognosis than *IDH1*-mutated glioblastomas, and *IDH1* mutation status accounts for the unfavorable prognostic effect of higher age: implications for classification of gliomas. *Acta Neuropathologica*. 2010;120(6):707-718.
22. Vogelbaum MA, Berkey B, Peereboom D, et al. Phase II trial of preirradiation and concurrent temozolomide in patients with newly diagnosed anaplastic oligodendrogliomas and mixed anaplastic oligoastrocytomas: RTOG BR0131. *Neuro Oncol*. 2009;11(2):167-175.
23. Vogelbaum MA, Hu C, Peereboom DM, et al. Phase II trial of pre-irradiation and concurrent temozolomide in patients with newly diagnosed anaplastic oligodendrogliomas and mixed anaplastic oligoastrocytomas: long term results of RTOG BR0131. *Journal of Neuro-Oncology*. 2015;124(3):413-420.

24. Baumert BG, Hegi ME, van den Bent MJ, et al. Temozolomide chemotherapy versus radiotherapy in high-risk low-grade glioma (EORTC 22033-26033): a randomised, open-label, phase 3 intergroup study. *The Lancet Oncology*. 2016;17(11):1521-1532.
25. Fisher BJ, Hu C, Macdonald DR, et al. Phase 2 study of temozolomide-based chemoradiation therapy for high-risk low-grade gliomas: preliminary results of Radiation Therapy Oncology Group 0424. *International journal of radiation oncology, biology, physics*. 2015;91(3):497-504.
26. Bell EH, Zhang P, Fisher BJ, et al. Association of MGMT Promoter Methylation Status With Survival Outcomes in Patients With High-Risk Glioma Treated With Radiotherapy and Temozolomide: An Analysis From the NRG Oncology/RTOG 0424 Trial. *JAMA Oncology*. 2018;4(10):1405-1409.
27. Fleming JL, Pugh SL, Fisher BJ, et al. Long-Term Report of a Comprehensive Molecular and Genomic Analysis in NRG Oncology/RTOG 0424: A Phase II Study of Radiation and Temozolomide in High-Risk Grade II Glioma. *JCO Precision Oncology*. 2021(5):1397-1407.
28. Buckner JC, Shaw EG, Pugh SL, et al. Radiation plus Procarbazine, CCNU, and Vincristine in Low-Grade Glioma. *N Engl J Med*. 2016;374(14):1344-1355.
29. Bell EH, Zhang P, Shaw EG, et al. Comprehensive Genomic Analysis in NRG Oncology/RTOG 9802: A Phase III Trial of Radiation Versus Radiation Plus Procarbazine, Lomustine (CCNU), and Vincristine in High-Risk Low-Grade Glioma. *Journal of Clinical Oncology*. 2020;38(29):3407-3417.
30. van den Bent MJ, Baumert B, Erridge SC, et al. Interim results from the CATNON trial (EORTC study 26053-22054) of treatment with concurrent and adjuvant temozolomide for 1p/19q non-co-deleted anaplastic glioma: a phase 3, randomised, open-label intergroup study. *The Lancet*. 2017;390(10103):1645-1653.
31. van den Bent MJ, Tesileanu CMS, Wick W, et al. Adjuvant and concurrent temozolomide for 1p/19q non-co-deleted anaplastic glioma (CATNON; EORTC study 26053-22054): second interim analysis of a randomised, open-label, phase 3 study. *The Lancet Oncology*.
32. Tesileanu CMS, van den Bent MJ, Sanson M, et al. Prognostic significance of genome-wide DNA methylation profiles within the randomised, phase 3, EORTC CATNON trial on non-1p/19q deleted anaplastic glioma. *Neuro Oncol*. 2021.
33. Tesileanu CMS, Sanson M, Wick W, et al. Temozolomide and Radiotherapy versus Radiotherapy Alone in Patients with Glioblastoma, IDH-wildtype: Post Hoc Analysis of the EORTC Randomized Phase III CATNON Trial. *Clinical Cancer Research*. 2022;28(12):2527-2535.
34. Qiu X, Chen Y, Bao Z, Chen L, Jiang T. Chemoradiotherapy with temozolomide vs. radiotherapy alone in patients with IDH wild-type and TERT promoter mutation WHO grade II/III gliomas: A prospective randomized study. *Radiotherapy and Oncology*. 2022;167:1-6.



eTable 2. Chemotherapy Regimens Used as First-Line Treatment

| Chemotherapy | Count | %     |
|--------------|-------|-------|
| TMZ          | 226   | 78.5% |
| PCV          | 61    | 21.2% |
| Carmustine   | 1     | 0.3%  |



eTable 3. Patient Demographical and Clinical Characteristics in *IDH*-Wildtype Tumors

| Characteristic          | Methylated, N = 56 <sup>1</sup> | Unmethylated, N = 79 <sup>1</sup> | p-value <sup>2</sup> |
|-------------------------|---------------------------------|-----------------------------------|----------------------|
| <b>Age</b>              |                                 |                                   | .73                  |
| 0 - 64                  | 44 (79%)                        | 64 (81%)                          |                      |
| 65+                     | 12 (21%)                        | 15 (19%)                          |                      |
| <b>Sex</b>              |                                 |                                   | .92                  |
| Male                    | 31 (55%)                        | 43 (54%)                          |                      |
| Female                  | 25 (45%)                        | 36 (46%)                          |                      |
| <b>Grade</b>            |                                 |                                   | .14                  |
| II                      | 6 (11%)                         | 16 (20%)                          |                      |
| III                     | 50 (89%)                        | 63 (80%)                          |                      |
| <b>Chemotherapy</b>     |                                 |                                   | <b>.007</b>          |
| No Chemotherapy         | 25 (45%)                        | 18 (23%)                          |                      |
| Chemotherapy            | 31 (55%)                        | 61 (77%)                          |                      |
| <b>Radiotherapy</b>     |                                 |                                   | <b>.002</b>          |
| No Radiotherapy/Unknown | 11 (20%)                        | 36 (46%)                          |                      |
| Radiotherapy            | 45 (80%)                        | 43 (54%)                          |                      |

<sup>1</sup>n (%)

<sup>2</sup>Pearson's Chi-squared test

eTable 4. Patient Demographical and Clinical Characteristics in *IDH*-Mutant/Non-Codeleted Tumors

| Characteristic          | Methylated, N = 79 <sup>1</sup> | Unmethylated, N = 70 <sup>1</sup> | p-value <sup>2</sup> |
|-------------------------|---------------------------------|-----------------------------------|----------------------|
| <b>Age</b>              |                                 |                                   | .50                  |
| 0 - 64                  | 77 (97%)                        | 70 (100%)                         |                      |
| 65+                     | 2 (2.5%)                        | 0 (0%)                            |                      |
| <b>Sex</b>              |                                 |                                   | .40                  |
| Male                    | 42 (53%)                        | 42 (60%)                          |                      |
| Female                  | 37 (47%)                        | 28 (40%)                          |                      |
| <b>Grade</b>            |                                 |                                   | .03                  |
| II                      | 27 (34%)                        | 36 (51%)                          |                      |
| III                     | 52 (66%)                        | 34 (49%)                          |                      |
| <b>Chemotherapy</b>     |                                 |                                   | .51                  |
| No Chemotherapy         | 21 (27%)                        | 22 (31%)                          |                      |
| Chemotherapy            | 58 (73%)                        | 48 (69%)                          |                      |
| <b>Radiotherapy</b>     |                                 |                                   | .09                  |
| No Radiotherapy/Unknown | 32 (41%)                        | 38 (54%)                          |                      |
| Radiotherapy            | 47 (59%)                        | 32 (46%)                          |                      |

<sup>1</sup>n (%)

<sup>2</sup>Fisher's exact test; Pearson's Chi-squared test

eTable 5. Patient Demographical and Clinical Characteristics in *IDH*-Mutant/Codeleted Tumors

| Characteristic          | Methylated, N = 94 <sup>1</sup> | Unmethylated, N = 33 <sup>1</sup> | p-value <sup>2</sup> |
|-------------------------|---------------------------------|-----------------------------------|----------------------|
| <b>Age</b>              |                                 |                                   | .44                  |
| 0 - 64                  | 86 (91%)                        | 32 (97%)                          |                      |
| 65+                     | 8 (8.5%)                        | 1 (3.0%)                          |                      |
| <b>Sex</b>              |                                 |                                   | .74                  |
| Male                    | 60 (64%)                        | 20 (61%)                          |                      |
| Female                  | 34 (36%)                        | 13 (39%)                          |                      |
| <b>Grade</b>            |                                 |                                   | .21                  |
| II                      | 45 (48%)                        | 20 (61%)                          |                      |
| III                     | 49 (52%)                        | 13 (39%)                          |                      |
| <b>Chemotherapy</b>     |                                 |                                   | .54                  |
| No Chemotherapy         | 26 (28%)                        | 11 (33%)                          |                      |
| Chemotherapy            | 68 (72%)                        | 22 (67%)                          |                      |
| <b>Radiotherapy</b>     |                                 |                                   | .35                  |
| No Radiotherapy/Unknown | 51 (54%)                        | 21 (64%)                          |                      |
| Radiotherapy            | 43 (46%)                        | 12 (36%)                          |                      |

<sup>1</sup>n (%)

<sup>2</sup>Fisher's exact test; Pearson's Chi-squared test

eTable 6. Univariable and Multivariable Analysis of Progression-Free Survival in All Patients that Received Chemotherapy

| Characteristic           | Univariable     |                     |                  | Multivariable   |                     |                  |
|--------------------------|-----------------|---------------------|------------------|-----------------|---------------------|------------------|
|                          | HR <sup>1</sup> | 95% CI <sup>1</sup> | p-value          | HR <sup>1</sup> | 95% CI <sup>1</sup> | p-value          |
| <b>Age</b>               | 1.03            | 1.02, 1.04          | <b>&lt; .001</b> | 1.01            | 1.00, 1.03          | <b>.04</b>       |
| <b>Sex</b>               |                 |                     |                  |                 |                     |                  |
| Male                     | —               | —                   |                  |                 |                     |                  |
| Female                   | 1.04            | 0.75, 1.43          | .83              |                 |                     |                  |
| <b>Grade</b>             |                 |                     |                  |                 |                     |                  |
| II                       | —               | —                   |                  | —               | —                   |                  |
| III                      | 2.38            | 1.60, 3.54          | <b>&lt; .001</b> | 1.90            | 1.27, 2.86          | <b>.002</b>      |
| <b>Molecular Class</b>   |                 |                     |                  |                 |                     |                  |
| IDH-wildtype             | —               | —                   |                  | —               | —                   |                  |
| IDH-mutant/non-codeleted | 0.22            | 0.15, 0.32          | <b>&lt; .001</b> | 0.30            | 0.19, 0.47          | <b>&lt; .001</b> |
| IDH-mutant/codeleted     | 0.15            | 0.10, 0.23          | <b>&lt; .001</b> | 0.24            | 0.15, 0.38          | <b>&lt; .001</b> |
| <b>Radiotherapy</b>      |                 |                     |                  |                 |                     |                  |
| No Radiotherapy/Unknown  | —               | —                   |                  |                 |                     |                  |
| Radiotherapy             | 1.26            | 0.91, 1.75          | .17              |                 |                     |                  |
| <b>MGMT</b>              |                 |                     |                  |                 |                     |                  |
| Methylated               | —               | —                   |                  | —               | —                   |                  |

| Characteristic | Univariable     |                     |                  | Multivariable   |                     |                  |
|----------------|-----------------|---------------------|------------------|-----------------|---------------------|------------------|
|                | HR <sup>1</sup> | 95% CI <sup>1</sup> | p-value          | HR <sup>1</sup> | 95% CI <sup>1</sup> | p-value          |
| Unmethylated   | 2.29            | 1.66, 3.17          | <b>&lt; .001</b> | 1.95            | 1.39, 2.75          | <b>&lt; .001</b> |

<sup>1</sup>HR = Hazard Ratio, CI = Confidence Interval

eTable 7. Univariable and Multivariable Analysis of Progression-Free Survival in *IDH*-wildtype Patients that Received Chemotherapy

| Characteristic          | Univariable     |                     |            | Multivariable   |                     |             |
|-------------------------|-----------------|---------------------|------------|-----------------|---------------------|-------------|
|                         | HR <sup>1</sup> | 95% CI <sup>1</sup> | p-value    | HR <sup>1</sup> | 95% CI <sup>1</sup> | p-value     |
| <b>Age</b>              | 1.01            | 0.99, 1.03          | .47        |                 |                     |             |
| <b>Sex</b>              |                 |                     |            |                 |                     |             |
| Male                    | —               | —                   |            |                 |                     |             |
| Female                  | 1.05            | 0.65, 1.71          | .84        |                 |                     |             |
| <b>Grade</b>            |                 |                     |            |                 |                     |             |
| II                      | —               | —                   |            | —               | —                   |             |
| III                     | 2.30            | 0.99, 5.34          | .05        | 2.68            | 1.14, 6.26          | <b>.02</b>  |
| <b>Radiotherapy</b>     |                 |                     |            |                 |                     |             |
| No Radiotherapy/Unknown | —               | —                   |            |                 |                     |             |
| Radiotherapy            | 0.81            | 0.49, 1.34          | .41        |                 |                     |             |
| <b>MGMT</b>             |                 |                     |            |                 |                     |             |
| Methylated              | —               | —                   |            | —               | —                   |             |
| Unmethylated            | 1.95            | 1.15, 3.30          | <b>.01</b> | 2.15            | 1.26, 3.66          | <b>.005</b> |

<sup>1</sup>HR = Hazard Ratio, CI = Confidence Interval

eTable 8. Univariable and Multivariable Analysis of Progression-Free Survival in *IDH*-mutant/non-codeleted Patients that Received Chemotherapy

| Characteristic          | Univariable     |                     |         | Multivariable   |                     |         |
|-------------------------|-----------------|---------------------|---------|-----------------|---------------------|---------|
|                         | HR <sup>1</sup> | 95% CI <sup>1</sup> | p-value | HR <sup>1</sup> | 95% CI <sup>1</sup> | p-value |
| <b>Age</b>              | 1.01            | 0.99, 1.04          | .34     |                 |                     |         |
| <b>Sex</b>              |                 |                     |         |                 |                     |         |
| Male                    | —               | —                   |         |                 |                     |         |
| Female                  | 0.66            | 0.36, 1.20          | .17     |                 |                     |         |
| <b>Grade</b>            |                 |                     |         |                 |                     |         |
| II                      | —               | —                   |         |                 |                     |         |
| III                     | 1.14            | 0.62, 2.11          | .67     |                 |                     |         |
| <b>Radiotherapy</b>     |                 |                     |         |                 |                     |         |
| No Radiotherapy/Unknown | —               | —                   |         | —               | —                   |         |
| Radiotherapy            | 1.81            | 0.95, 3.44          | .07     | 1.81            | 0.95, 3.44          | .07     |
| <b>MGMT</b>             |                 |                     |         |                 |                     |         |
| Methylated              | —               | —                   |         |                 |                     |         |
| Unmethylated            | 1.19            | 0.67, 2.12          | .56     |                 |                     |         |

<sup>1</sup>HR = Hazard Ratio, CI = Confidence Interval

eTable 9. Univariable and Multivariable Analysis of Progression-Free Survival in *IDH*-mutant/codeleted Patients that Received Chemotherapy

| Characteristic          | Univariable     |                     |             | Multivariable   |                     |             |
|-------------------------|-----------------|---------------------|-------------|-----------------|---------------------|-------------|
|                         | HR <sup>1</sup> | 95% CI <sup>1</sup> | p-value     | HR <sup>1</sup> | 95% CI <sup>1</sup> | p-value     |
| <b>Age</b>              | 1.00            | 0.97, 1.03          | .97         |                 |                     |             |
| <b>Sex</b>              |                 |                     |             |                 |                     |             |
| Male                    | —               | —                   |             |                 |                     |             |
| Female                  | 1.16            | 0.61, 2.23          | .65         |                 |                     |             |
| <b>Grade</b>            |                 |                     |             |                 |                     |             |
| II                      | —               | —                   |             | —               | —                   |             |
| III                     | 2.82            | 1.32, 6.02          | <b>.007</b> | 3.17            | 1.48, 6.80          | <b>.003</b> |
| <b>Radiotherapy</b>     |                 |                     |             |                 |                     |             |
| No Radiotherapy/Unknown | —               | —                   |             |                 |                     |             |
| Radiotherapy            | 0.78            | 0.40, 1.51          | .46         |                 |                     |             |
| <b>MGMT</b>             |                 |                     |             |                 |                     |             |
| Methylated              | —               | —                   |             | —               | —                   |             |
| Unmethylated            | 2.54            | 1.24, 5.20          | <b>.01</b>  | 2.99            | 1.44, 6.21          | <b>.003</b> |

<sup>1</sup>HR = Hazard Ratio, CI = Confidence Interval



eTable 10. Univariable and Multivariable Analysis of Overall Survival in All Patients that Received Chemotherapy

| Characteristic           | Univariable     |                     |                  | Multivariable   |                     |                  |
|--------------------------|-----------------|---------------------|------------------|-----------------|---------------------|------------------|
|                          | HR <sup>1</sup> | 95% CI <sup>1</sup> | p-value          | HR <sup>1</sup> | 95% CI <sup>1</sup> | p-value          |
| <b>Age</b>               | 1.04            | 1.03, 1.06          | <b>&lt; .001</b> | 1.03            | 1.01, 1.04          | <b>&lt; .001</b> |
| <b>Sex</b>               |                 |                     |                  |                 |                     |                  |
| Male                     | —               | —                   |                  |                 |                     |                  |
| Female                   | 0.96            | 0.66, 1.40          | .83              |                 |                     |                  |
| <b>Grade</b>             |                 |                     |                  |                 |                     |                  |
| II                       | —               | —                   |                  | —               | —                   |                  |
| III                      | 1.99            | 1.26, 3.13          | <b>.003</b>      | 1.37            | 0.86, 2.17          | .18              |
| <b>Molecular Class</b>   |                 |                     |                  |                 |                     |                  |
| IDH-wildtype             | —               | —                   |                  | —               | —                   |                  |
| IDH-mutant/non-codeleted | 0.18            | 0.12, 0.29          | <b>&lt; .001</b> | 0.26            | 0.16, 0.44          | <b>&lt; .001</b> |
| IDH-mutant/codeleted     | 0.08            | 0.04, 0.14          | <b>&lt; .001</b> | 0.11            | 0.06, 0.21          | <b>&lt; .001</b> |
| <b>Radiotherapy</b>      |                 |                     |                  |                 |                     |                  |
| No Radiotherapy/Unknown  | —               | —                   |                  | —               | —                   |                  |
| Radiotherapy             | 1.85            | 1.21, 2.81          | <b>.004</b>      | 1.00            | 0.64, 1.57          | .99              |
| <b>MGMT</b>              |                 |                     |                  |                 |                     |                  |

| Characteristic | Univariable     |                     |                  | Multivariable   |                     |            |
|----------------|-----------------|---------------------|------------------|-----------------|---------------------|------------|
|                | HR <sup>1</sup> | 95% CI <sup>1</sup> | p-value          | HR <sup>1</sup> | 95% CI <sup>1</sup> | p-value    |
| Methylated     | —               | —                   |                  | —               | —                   |            |
| Unmethylated   | 2.30            | 1.57, 3.37          | <b>&lt; .001</b> | 1.65            | 1.11, 2.46          | <b>.01</b> |

<sup>1</sup>HR = Hazard Ratio, CI = Confidence Interval

eTable 11. Univariable and Multivariable Analysis of Overall Survival in *IDH*-wildtype Patients that Received Chemotherapy

| Characteristic          | Univariable     |                     |            | Multivariable   |                     |            |
|-------------------------|-----------------|---------------------|------------|-----------------|---------------------|------------|
|                         | HR <sup>1</sup> | 95% CI <sup>1</sup> | p-value    | HR <sup>1</sup> | 95% CI <sup>1</sup> | p-value    |
| <b>Age</b>              | 1.03            | 1.01, 1.05          | <b>.01</b> | 1.03            | 1.00, 1.05          | <b>.02</b> |
| <b>Sex</b>              |                 |                     |            |                 |                     |            |
| Male                    | —               | —                   |            |                 |                     |            |
| Female                  | 0.83            | 0.50, 1.38          | .47        |                 |                     |            |
| <b>Grade</b>            |                 |                     |            |                 |                     |            |
| II                      | —               | —                   |            | —               | —                   |            |
| III                     | 1.77            | 0.83, 3.74          | .14        | 1.92            | 0.90, 4.09          | .09        |
| <b>Radiotherapy</b>     |                 |                     |            |                 |                     |            |
| No Radiotherapy/Unknown | —               | —                   |            |                 |                     |            |
| Radiotherapy            | 0.65            | 0.36, 1.19          | .16        |                 |                     |            |
| <b>MGMT</b>             |                 |                     |            |                 |                     |            |
| Methylated              | —               | —                   |            | —               | —                   |            |
| Unmethylated            | 1.83            | 1.06, 3.15          | <b>.03</b> | 1.69            | 0.98, 2.91          | .06        |

<sup>1</sup>HR = Hazard Ratio, CI = Confidence Interval

eTable 12. Univariable and Multivariable Analysis of Overall Survival in *IDH*-mutant/non-codeleted Patients that Received Chemotherapy

| Characteristic          | Univariable     |                     |         | Multivariable   |                     |         |
|-------------------------|-----------------|---------------------|---------|-----------------|---------------------|---------|
|                         | HR <sup>1</sup> | 95% CI <sup>1</sup> | p-value | HR <sup>1</sup> | 95% CI <sup>1</sup> | p-value |
| <b>Age</b>              | 1.00            | 0.97, 1.03          | .89     |                 |                     |         |
| <b>Sex</b>              |                 |                     |         |                 |                     |         |
| Male                    | —               | —                   |         | —               | —                   |         |
| Female                  | 0.49            | 0.24, 1.03          | .06     | 0.49            | 0.24, 1.03          | .06     |
| <b>Grade</b>            |                 |                     |         |                 |                     |         |
| II                      | —               | —                   |         |                 |                     |         |
| III                     | 0.74            | 0.37, 1.48          | .39     |                 |                     |         |
| <b>Radiotherapy</b>     |                 |                     |         |                 |                     |         |
| No Radiotherapy/Unknown | —               | —                   |         |                 |                     |         |
| Radiotherapy            | 1.46            | 0.67, 3.18          | .35     |                 |                     |         |
| <b>MGMT</b>             |                 |                     |         |                 |                     |         |
| Methylated              | —               | —                   |         |                 |                     |         |
| Unmethylated            | 1.07            | 0.54, 2.12          | .85     |                 |                     |         |

<sup>1</sup>HR = Hazard Ratio, CI = Confidence Interval

eTable 13. Univariable and Multivariable Analysis of Overall Survival in *IDH*-mutant/codeleted Patients that Received Chemotherapy

| Characteristic          | Univariable     |                     |            | Multivariable   |                     |            |
|-------------------------|-----------------|---------------------|------------|-----------------|---------------------|------------|
|                         | HR <sup>1</sup> | 95% CI <sup>1</sup> | p-value    | HR <sup>1</sup> | 95% CI <sup>1</sup> | p-value    |
| <b>Age</b>              | 1.03            | 0.99, 1.08          | .14        | 1.04            | 0.99, 1.08          | .09        |
| <b>Sex</b>              |                 |                     |            |                 |                     |            |
| Male                    | —               | —                   |            |                 |                     |            |
| Female                  | 0.96            | 0.35, 2.65          | .94        |                 |                     |            |
| <b>Grade</b>            |                 |                     |            |                 |                     |            |
| II                      | —               | —                   |            | —               | —                   |            |
| III                     | 5.56            | 1.26, 24.6          | <b>.02</b> | 4.87            | 1.07, 22.2          | <b>.04</b> |
| <b>Radiotherapy</b>     |                 |                     |            |                 |                     |            |
| No Radiotherapy/Unknown | —               | —                   |            | —               | —                   |            |
| Radiotherapy            | 2.76            | 0.87, 8.75          | .08        | 2.37            | 0.69, 8.09          | .17        |
| <b>MGMT</b>             |                 |                     |            |                 |                     |            |
| Methylated              | —               | —                   |            | —               | —                   |            |
| Unmethylated            | 2.40            | 0.81, 7.17          | .12        | 4.21            | 1.25, 14.2          | <b>.02</b> |

<sup>1</sup>HR = Hazard Ratio, CI = Confidence Interval

eTable 14. Summary of Univariable and Multivariable Subgroup Analyses in All Patients with Any First-Line Treatment

| Molecular Subgroup               | Univariable        |                     |                  | Multivariable      |            |             |
|----------------------------------|--------------------|---------------------|------------------|--------------------|------------|-------------|
|                                  | HR of <i>uMGMT</i> | 95% CI <sup>1</sup> | p-value          | HR of <i>uMGMT</i> | 95% CI     | p-value     |
| <b>Progression-Free Survival</b> |                    |                     |                  |                    |            |             |
| All Cases                        | 1.67               | 1.29, 2.15          | <b>&lt; .001</b> | 1.36               | 1.04, 1.79 | <b>.03</b>  |
| IDH-wildtype                     | 1.17               | 0.79, 1.73          | .44              | NA                 | NA         | NA          |
| IDH-mutant/non-codeleted         | 0.99               | 0.63, 1.57          | .98              | NA                 | NA         | NA          |
| IDH-mutant/codeleted             | 2.16               | 1.19, 3.90          | <b>.01</b>       | 2.54               | 1.38, 4.67 | <b>.003</b> |
| <b>Overall Survival</b>          |                    |                     |                  |                    |            |             |
| All Cases                        | 1.57               | 1.16, 2.12          | <b>.003</b>      | 1.17               | 0.86, 1.60 | .31         |
| IDH-wildtype                     | 1.24               | 0.83, 1.87          | .30              | NA                 | NA         | NA          |
| IDH-mutant/non-codeleted         | 0.90               | 0.51, 1.57          | .70              | NA                 | NA         | NA          |
| IDH-mutant/codeleted             | 1.64               | 0.69, 3.92          | .26              | NA                 | NA         | NA          |

*uMGMT* = unmethylated *MGMT* promoter, HR = Hazard Ratio, CI = Confidence Interval, NA = not applicable

Table 15. Summary of Univariable and Multivariable Subgroup Analyses in Patients that Received No Chemotherapy During First-Line Treatment

| Molecular Subgroup               | Univariable        |                     |         | Multivariable      |            |            |
|----------------------------------|--------------------|---------------------|---------|--------------------|------------|------------|
|                                  | HR of <i>uMGMT</i> | 95% CI <sup>1</sup> | p-value | HR of <i>uMGMT</i> | 95% CI     | p-value    |
| <b>Progression-Free Survival</b> |                    |                     |         |                    |            |            |
| All Cases                        | 0.98               | 0.62, 1.53          | .93     | NA                 | NA         | NA         |
| IDH-wildtype                     | 0.54               | 0.28, 1.05          | .07     | 0.42               | 0.21, 0.85 | <b>.02</b> |
| IDH-mutant/non-codeleted         | 0.76               | 0.35, 1.66          | .50     | NA                 | NA         | NA         |
| IDH-mutant/codeleted             | 1.46               | 0.48, 4.44          | .50     | NA                 | NA         | NA         |
| <b>Overall Survival</b>          |                    |                     |         |                    |            |            |
| All Cases                        | 0.79               | 0.46, 1.36          | .40     | NA                 | NA         | NA         |
| IDH-wildtype                     | 0.76               | 0.38, 1.53          | .44     | NA                 | NA         | NA         |
| IDH-mutant/non-codeleted         | 0.54               | 0.18, 1.57          | .26     | NA                 | NA         | NA         |
| IDH-mutant/codeleted             | 0.73               | 0.15, 3.46          | .69     | NA                 | NA         | NA         |

*uMGMT* = unmethylated *MGMT* promoter, HR = Hazard Ratio, CI = Confidence Interval, NA = not applicable

eTable 16. Summary of Sensitivity Analysis of Univariable and Multivariable Subgroup Analyses in Patients that Received Chemotherapy

| Molecular Subgroup               | Univariable |                     |         |                                        | Multivariable |            |         |                                        |
|----------------------------------|-------------|---------------------|---------|----------------------------------------|---------------|------------|---------|----------------------------------------|
|                                  | HR of uMGMT | 95% CI <sup>1</sup> | p-value | p-value for interaction with treatment | HR of uMGMT   | 95% CI     | p-value | p-value for interaction with treatment |
| <b>Progression-Free Survival</b> |             |                     |         |                                        |               |            |         |                                        |
| All Cases                        | 2.29        | 1.66, 3.17          | < .001  | .004                                   | 2.05          | 1.46, 2.89 | < .001  | .005                                   |
| IDH-wildtype                     | 2.04        | 1.21, 3.45          | .007    | .01                                    | 2.26          | 1.33, 3.83 | .002    | .004                                   |
| IDH-mutant/non-codeleted         | 1.19        | 0.67, 2.12          | .56     | .41                                    | NA            | NA         | NA      | .94                                    |
| IDH-mutant/codeleted             | 2.52        | 1.23, 5.18          | .01     | .25                                    | 2.92          | 1.40, 6.07 | .004    | .37                                    |
| <b>Overall Survival</b>          |             |                     |         |                                        |               |            |         |                                        |
| All Cases                        | 2.30        | 1.57, 3.37          | < .001  | .003                                   | 1.78          | 1.20, 2.65 | .004    | .01                                    |
| IDH-wildtype                     | 1.91        | 1.11, 3.27          | .02     | .12                                    | 1.80          | 1.04, 3.10 | .04     | .06                                    |
| IDH-mutant/non-codeleted         | 1.07        | 0.54, 2.12          | .85     | .32                                    | NA            | NA         | NA      | .70                                    |
| IDH-mutant/codeleted             | 2.43        | 0.80, 7.32          | .12     | .09                                    | 3.00          | 0.96, 9.37 | .06     | .08                                    |

uMGMT = unmethylated MGMT promoter, HR = Hazard Ratio, CI = Confidence Interval, NA = not applicable



eTable 17. Univariable and Multivariable Analysis of Progression-Free Survival in Age 0 – 43 *IDH*-wildtype Patients that Received Chemotherapy

| Characteristic          | Univariable     |                     |         | Multivariable   |                     |         |
|-------------------------|-----------------|---------------------|---------|-----------------|---------------------|---------|
|                         | HR <sup>1</sup> | 95% CI <sup>1</sup> | p-value | HR <sup>1</sup> | 95% CI <sup>1</sup> | p-value |
| <b>Sex</b>              |                 |                     |         |                 |                     |         |
| Male                    | —               | —                   |         | -               | -                   | -       |
| Female                  | 0.93            | 0.27, 3.21          | .91     | -               | -                   | -       |
| <b>Grade</b>            |                 |                     |         |                 |                     |         |
| II                      | —               | —                   |         | -               | -                   | -       |
| III                     | 1.46            | 0.31, 6.92          | .63     | -               | -                   | -       |
| <b>Radiotherapy</b>     |                 |                     |         |                 |                     |         |
| No Radiotherapy/Unknown | —               | —                   |         | -               | -                   | -       |
| Radiotherapy            | 0.55            | 0.15, 1.99          | .36     | -               | -                   | -       |
| <b>MGMT</b>             |                 |                     |         |                 |                     |         |
| Methylated              | —               | —                   |         | -               | -                   | -       |
| Unmethylated            | 2               | 0.60, 6.75          | .26     | -               | -                   | -       |

<sup>1</sup>HR = Hazard Ratio, CI = Confidence Interval

eTable 18. Univariable and Multivariable Analysis of Progression-Free Survival in Age 44+ *IDH*-wildtype Patients that Received Chemotherapy

| Characteristic              | Univariable     |                     |         | Multivariable   |                     |             |
|-----------------------------|-----------------|---------------------|---------|-----------------|---------------------|-------------|
|                             | HR <sup>1</sup> | 95% CI <sup>1</sup> | p-value | HR <sup>1</sup> | 95% CI <sup>1</sup> | p-value     |
| <b>Sex</b>                  |                 |                     |         |                 |                     |             |
| Male                        | —               | —                   |         |                 |                     |             |
| Female                      | 1.13            | 0.67, 1.92          | .64     |                 |                     |             |
| <b>Grade</b>                |                 |                     |         |                 |                     |             |
| II                          | —               | —                   |         | —               | —                   |             |
| III                         | 2.55            | 0.92, 7.08          | .07     | 3.65            | 1.29, 10.4          | <b>.02</b>  |
| <b>Radiotherapy</b>         |                 |                     |         |                 |                     |             |
| No Radiotherapy/Unknown     | —               | —                   |         |                 |                     |             |
| Radiotherapy                | 0.88            | 0.51, 1.52          | .64     |                 |                     |             |
| <b>MGMT Promoter Status</b> |                 |                     |         |                 |                     |             |
| Methylated                  | —               | —                   |         | —               | —                   |             |
| Unmethylated                | 1.81            | 1.00, 3.30          | .05     | 2.35            | 1.27, 4.35          | <b>.007</b> |

<sup>1</sup>HR = Hazard Ratio, CI = Confidence Interval

eTable 19. Univariable and Multivariable Analysis of Progression-Free Survival in Grade III\* *IDH*-wildtype Patients that Received Chemotherapy

| Characteristic          | Univariable     |                     |             | Multivariable   |                     |             |
|-------------------------|-----------------|---------------------|-------------|-----------------|---------------------|-------------|
|                         | HR <sup>1</sup> | 95% CI <sup>1</sup> | p-value     | HR <sup>1</sup> | 95% CI <sup>1</sup> | p-value     |
| <b>Age</b>              | 1.01            | 0.99, 1.03          | .33         |                 |                     |             |
| <b>Sex</b>              |                 |                     |             |                 |                     |             |
| Male                    | —               | —                   |             |                 |                     |             |
| Female                  | 1.00            | 0.60, 1.67          | .99         |                 |                     |             |
| <b>Radiotherapy</b>     |                 |                     |             |                 |                     |             |
| No Radiotherapy/Unknown | —               | —                   |             |                 |                     |             |
| Radiotherapy            | 0.87            | 0.52, 1.46          | .60         |                 |                     |             |
| <b>MGMT</b>             |                 |                     |             |                 |                     |             |
| Methylated              | —               | —                   |             | —               | —                   |             |
| Unmethylated            | 2.21            | 1.27, 3.86          | <b>.005</b> | 2.21            | 1.27, 3.86          | <b>.005</b> |

<sup>1</sup>HR = Hazard Ratio, CI = Confidence Interval

\*There were not enough grade II cases to fit a multivariable model. See Supplemental Figure S4.

eTable 20. Univariable and Multivariable Analysis of Progression-Free Survival in Grade II *IDH*-mutant/non-codeleted Patients that Received Chemotherapy

| Characteristic              | Univariable     |                     |         | Multivariable   |                     |         |
|-----------------------------|-----------------|---------------------|---------|-----------------|---------------------|---------|
|                             | HR <sup>1</sup> | 95% CI <sup>1</sup> | p-value | HR <sup>1</sup> | 95% CI <sup>1</sup> | p-value |
| <b>Age</b>                  | 0.98            | 0.94, 1.03          | .49     | -               | -                   | -       |
| <b>Sex</b>                  |                 |                     |         |                 |                     |         |
| Male                        | —               | —                   |         | —               | —                   |         |
| Female                      | 0.44            | 0.14, 1.31          | .14     | 0.44            | 0.14, 1.31          | .14     |
| <b>Radiotherapy</b>         |                 |                     |         |                 |                     |         |
| No Radiotherapy/Unknown     | —               | —                   |         |                 |                     |         |
| Radiotherapy                | 0.85            | 0.29, 2.53          | .78     | -               | -                   | -       |
| <b>MGMT Promoter Status</b> |                 |                     |         |                 |                     |         |
| Methylated                  | —               | —                   |         |                 |                     |         |
| Unmethylated                | 1.07            | 0.38, 2.97          | .9      | -               | -                   | -       |

<sup>1</sup>HR = Hazard Ratio, CI = Confidence Interval

eTable 21. Univariable and Multivariable Analysis of Progression-Free Survival in Grade III *IDH*-mutant/non-codeleted Patients that Received Chemotherapy

| Characteristic              | Univariable     |                     |         | Multivariable   |                     |         |
|-----------------------------|-----------------|---------------------|---------|-----------------|---------------------|---------|
|                             | HR <sup>1</sup> | 95% CI <sup>1</sup> | p-value | HR <sup>1</sup> | 95% CI <sup>1</sup> | p-value |
| <b>Age</b>                  | 1.03            | 1.00, 1.07          | .08     | 1.03            | 0.99, 1.06          | .14     |
| <b>Sex</b>                  |                 |                     |         |                 |                     |         |
| Male                        | —               | —                   |         |                 |                     |         |
| Female                      | 0.75            | 0.36, 1.55          | .44     |                 |                     |         |
| <b>Radiotherapy</b>         |                 |                     |         |                 |                     |         |
| No Radiotherapy/Unknown     | —               | —                   |         | —               | —                   |         |
| Radiotherapy                | 2.20            | 0.95, 5.09          | .07     | 2.03            | 0.87, 4.75          | .10     |
| <b>MGMT Promoter Status</b> |                 |                     |         |                 |                     |         |
| Methylated                  | —               | —                   |         |                 |                     |         |
| Unmethylated                | 1.28            | 0.64, 2.59          | .48     |                 |                     |         |

<sup>1</sup>HR = Hazard Ratio, CI = Confidence Interval

eTable 22. Univariable and Multivariable Analysis of Overall Survival in IDH-mutant/codeleted Patients that Received Chemotherapy, Using  $P < .05$  as Threshold for Inclusion

| Characteristic          | Univariable     |                     |                | Multivariable   |                     |                |
|-------------------------|-----------------|---------------------|----------------|-----------------|---------------------|----------------|
|                         | HR <sup>1</sup> | 95% CI <sup>1</sup> | <i>P</i> value | HR <sup>1</sup> | 95% CI <sup>1</sup> | <i>P</i> value |
| <b>Age</b>              | 1.03            | 0.99, 1.08          | .14            | —               | —                   | —              |
| <b>Sex</b>              |                 |                     |                |                 |                     |                |
| Male                    | Reference       |                     |                |                 |                     |                |
| Female                  | 0.96            | 0.35, 2.65          | .94            | —               | —                   | —              |
| <b>Grade</b>            |                 |                     |                |                 |                     |                |
| II                      | Reference       |                     |                |                 |                     |                |
| III                     | 5.56            | 1.26, 24.6          | <b>.02</b>     | 5.92            | 1.34, 26.2          | <b>.02</b>     |
| <b>Radiotherapy</b>     |                 |                     |                |                 |                     |                |
| No Radiotherapy/Unknown | Reference       |                     |                |                 |                     |                |
| Radiotherapy            | 2.76            | 0.87, 8.75          | .08            | —               | —                   | —              |
| <b>MGMT</b>             |                 |                     |                |                 |                     |                |
| Methylated              | Reference       |                     |                |                 |                     |                |
| Unmethylated            | 2.40            | 0.81, 7.17          | .12            | 2.75            | 0.90, 8.35          | .08            |

<sup>1</sup>HR = Hazard Ratio, CI = Confidence Interval

eTable 23. Patient Demographic and Clinical Characteristics of IDH-wildtype and IDH-mutant/codeleted Patients in the EORTC/CUIMC Cohorts

| Characteristic       | Methylated, N = 78 <sup>1</sup> | Unmethylated, N = 46 <sup>1</sup> | P value <sup>2</sup> |
|----------------------|---------------------------------|-----------------------------------|----------------------|
| Age                  | 48 (38 – 58)                    | 52 (40 – 58)                      | .57                  |
| Sex                  |                                 |                                   | 0.40                 |
| Male                 | 50 (64%)                        | 26 (57%)                          |                      |
| Female               | 28 (36%)                        | 20 (43%)                          |                      |
| Molecular Class      |                                 |                                   | <b>&lt;0.001</b>     |
| IDH-wildtype         | 40 (51%)                        | 38 (83%)                          |                      |
| IDH-mutant/codeleted | 38 (49%)                        | 8 (17%)                           |                      |
| Grade                |                                 |                                   | 0.37                 |
| II                   | 11 (14%)                        | 4 (8.7%)                          |                      |
| III                  | 67 (86%)                        | 42 (91%)                          |                      |
| Chemotherapy         |                                 |                                   | .07                  |
| Yes                  | 43 (55%)                        | 33 (72%)                          |                      |
| No                   | 35 (45%)                        | 13 (28%)                          |                      |
| Radiotherapy         |                                 |                                   | .47                  |
| Yes                  | 74 (95%)                        | 42 (91%)                          |                      |
| No                   | 4 (5.1%)                        | 4 (8.7%)                          |                      |

| Characteristic        | Methylated, N = 78 <sup>1</sup> | Unmethylated, N = 46 <sup>1</sup> | <i>P</i> value <sup>2</sup> |
|-----------------------|---------------------------------|-----------------------------------|-----------------------------|
| Performance Status    |                                 |                                   | .87                         |
| KPS ≥ 80 or ECOG 0-1  | 65 (83%)                        | 38 (84%)                          |                             |
| KPS < 80 or ECOG 2    | 13 (17%)                        | 7 (16%)                           |                             |
| Extent of Resection   |                                 |                                   | .33                         |
| Biopsy                | 5 (6.5%)                        | 7 (15%)                           |                             |
| Subtotal Resection    | 44 (57%)                        | 24 (52%)                          |                             |
| Gross-total Resection | 28 (36%)                        | 15 (33%)                          |                             |

<sup>1</sup>n (%); Median (Interquartile Range)

<sup>2</sup>Fisher's exact test; Pearson's Chi-squared test; Wilcoxon rank sum test



eTable 24. Univariable and Multivariable Analysis of Progression-Free Survival in Patients with IDH-wildtype and IDH-mutant/codeleted Tumors that Received Chemotherapy in the EORTC/CUIMC Cohorts, Including Performance Status and Extent of Resection

| Characteristic             | Univariable     |                     |                | Multivariable   |                     |                |
|----------------------------|-----------------|---------------------|----------------|-----------------|---------------------|----------------|
|                            | HR <sup>1</sup> | 95% CI <sup>1</sup> | <i>P</i> value | HR <sup>1</sup> | 95% CI <sup>1</sup> | <i>P</i> value |
| <b>Performance Status</b>  |                 |                     |                |                 |                     |                |
| KPS < 80 or ECOG 2         | Reference       |                     |                | —               | —                   | —              |
| KPS ≥ 80 or ECOG 0-1       | 0.65            | 0.30, 1.38          | .26            | —               | —                   | —              |
| <b>Extent of Resection</b> |                 |                     |                |                 |                     |                |
| Biopsy                     | Reference       |                     |                |                 |                     |                |
| Subtotal Resection         | 0.23            | 0.10, 0.54          | <.001          | 0.29            | 0.13, 0.66          | .003           |
| Gross-total Resection      | 0.22            | 0.09, 0.53          | <.001          | 0.29            | 0.12, 0.72          | .007           |
| <b>MGMT</b>                |                 |                     |                |                 |                     |                |
| Methylated                 | Reference       |                     |                |                 |                     |                |
| Unmethylated               | 2.66            | 1.52, 4.67          | <.001          | 2.41            | 1.35, 4.29          | .003           |

<sup>1</sup>HR = Hazard Ratio, CI = Confidence Interval

eTable 25. Univariable and Multivariable Analysis of Progression-Free Survival in Patients with IDH-wildtype and IDH-mutant/codeleted Tumors that Received No Chemotherapy in the EORTC/CUIMC Cohorts, Including Performance Status and Extent of Resection

| Characteristic             | Univariable     |                     |                | Multivariable   |                     |                |
|----------------------------|-----------------|---------------------|----------------|-----------------|---------------------|----------------|
|                            | HR <sup>1</sup> | 95% CI <sup>1</sup> | <i>P</i> value | HR <sup>1</sup> | 95% CI <sup>1</sup> | <i>P</i> value |
| <b>Performance Status</b>  |                 |                     |                |                 |                     |                |
| KPS < 80 or ECOG 2         | Reference       |                     |                |                 |                     |                |
| KPS ≥ 80 or ECOG 0-1       | 0.63            | 0.31, 1.28          | .20            | —               | —                   | —              |
| <b>Extent of Resection</b> |                 |                     |                |                 |                     |                |
| Biopsy                     | Reference       |                     |                |                 |                     |                |
| Subtotal Resection         | 0.88            | 0.30, 2.60          | .82            | —               | —                   | —              |
| Gross-total Resection      | 0.53            | 0.17, 1.67          | .28            | —               | —                   | —              |
| <b>MGMT</b>                |                 |                     |                |                 |                     |                |
| Methylated                 | Reference       |                     |                |                 |                     |                |
| Unmethylated               | 1.39            | 0.71, 2.72          | .33            | —               | —                   | —              |

<sup>1</sup>HR = Hazard Ratio, CI = Confidence Interval

eTable 26. Univariable and Multivariable Analysis of Overall Survival in Patients with IDH-wildtype and IDH-mutant/codeleted Tumors that Received Chemotherapy in the EORTC/CUIMC Cohorts, Including Performance Status and Extent of Resection

| Characteristic             | Univariable     |                     |                | Multivariable   |                     |                |
|----------------------------|-----------------|---------------------|----------------|-----------------|---------------------|----------------|
|                            | HR <sup>1</sup> | 95% CI <sup>1</sup> | <i>P</i> value | HR <sup>1</sup> | 95% CI <sup>1</sup> | <i>P</i> value |
| <b>Performance Status</b>  |                 |                     |                |                 |                     |                |
| KPS < 80 or ECOG 2         | Reference       |                     |                |                 |                     |                |
| KPS ≥ 80 or ECOG 0-1       | 0.63            | 0.26, 1.52          | .31            | —               | —                   | —              |
| <b>Extent of Resection</b> |                 |                     |                |                 |                     |                |
| Biopsy                     | Reference       |                     |                |                 |                     |                |
| Subtotal Resection         | 0.52            | 0.19, 1.41          | .20            | —               | —                   | —              |
| Gross-total Resection      | 0.48            | 0.17, 1.39          | .18            | —               | —                   | —              |
| <b>MGMT</b>                |                 |                     |                |                 |                     |                |
| Methylated                 | Reference       |                     |                |                 |                     |                |
| Unmethylated               | 2.70            | 1.42, 5.14          | <b>.003</b>    | 2.70            | 1.42, 5.14          | <b>.003</b>    |

<sup>1</sup>HR = Hazard Ratio, CI = Confidence Interval

eTable 27. Univariable and Multivariable Analysis of Overall Survival in Patients with IDH-wildtype and IDH-mutant/codeleted Tumors that Received No Chemotherapy in the EORTC/CUIMC Cohorts, Including Performance Status and Extent of Resection

| Characteristic             | Univariable     |                     |                | Multivariable   |                     |                |
|----------------------------|-----------------|---------------------|----------------|-----------------|---------------------|----------------|
|                            | HR <sup>1</sup> | 95% CI <sup>1</sup> | <i>P</i> value | HR <sup>1</sup> | 95% CI <sup>1</sup> | <i>P</i> value |
| <b>Performance Status</b>  |                 |                     |                |                 |                     |                |
| KPS < 80 or ECOG 2         | Reference       |                     |                |                 |                     |                |
| KPS ≥ 80 or ECOG 0-1       | 0.70            | 0.33, 1.46          | .34            | —               | —                   | —              |
| <b>Extent of Resection</b> |                 |                     |                |                 |                     |                |
| Biopsy                     | Reference       |                     |                |                 |                     |                |
| Subtotal Resection         | 0.57            | 0.19, 1.68          | .31            | 0.57            | 0.19, 1.68          | .31            |
| Gross-total Resection      | 0.29            | 0.09, 0.93          | <b>.04</b>     | 0.29            | 0.09, 0.93          | <b>.04</b>     |
| <b>MGMT</b>                |                 |                     |                |                 |                     |                |
| Methylated                 | Reference       |                     |                |                 |                     |                |
| Unmethylated               | 1.45            | 0.73, 2.87          | .28            | —               | —                   | —              |

<sup>1</sup>HR = Hazard Ratio, CI = Confidence Interval

eFigure 1. Kaplan-Meier curves for progression-free (A) and overall (B) survival based on *MGMT* promoter methylation status in all patients, regardless of treatment status. Plots are stratified by molecular subgroup.

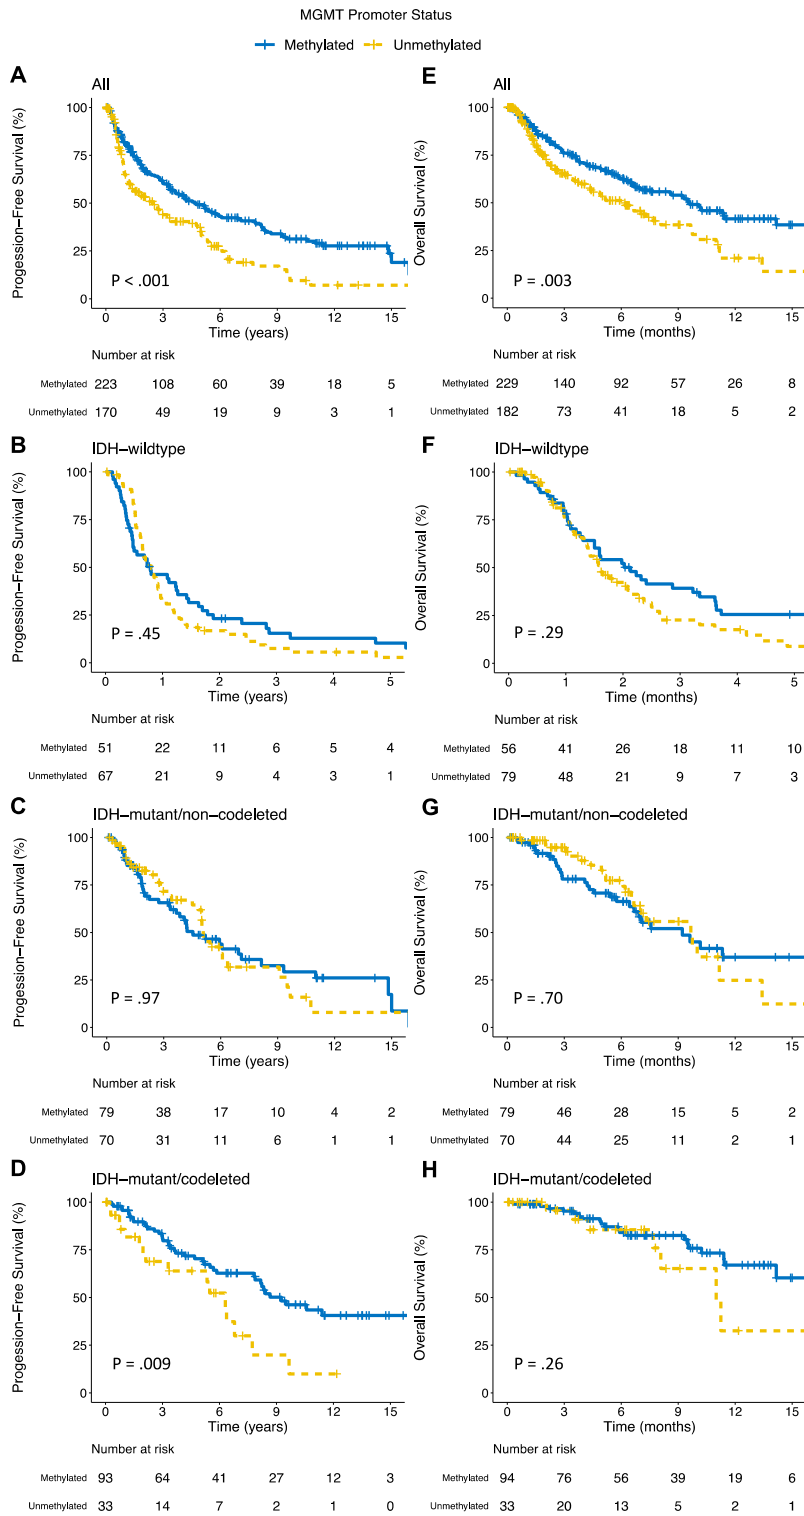

eFigure 2. Kaplan-Meier curves for (A-D) progression-free survival and (E-H) overall survival based on *MGMT* promoter methylation status in patients that did not receive chemotherapy. Plots are stratified by molecular subgroup.

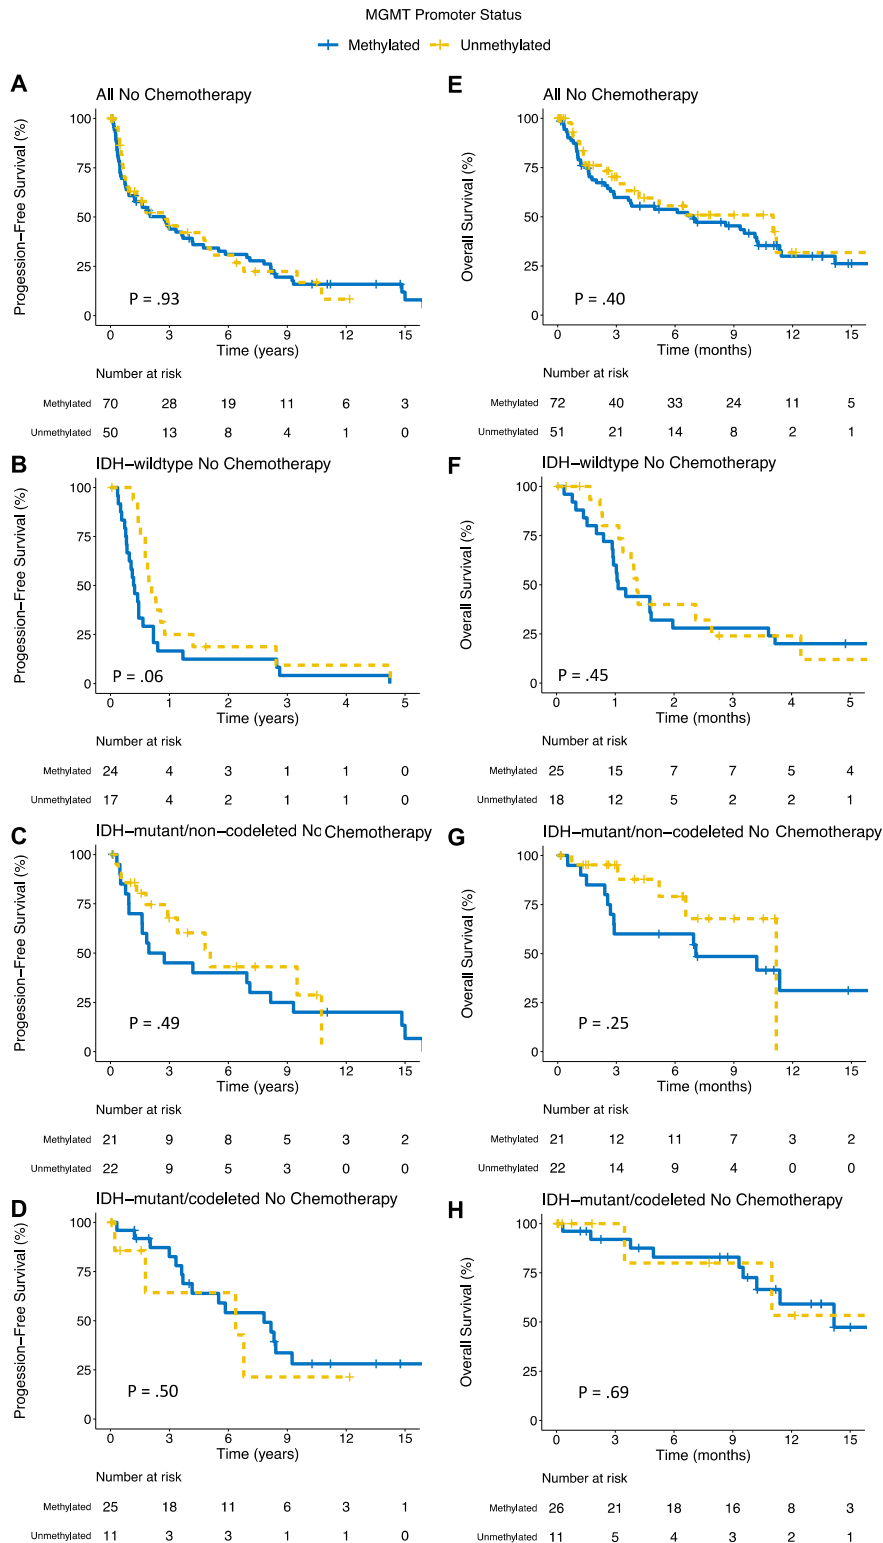

eFigure 3. Schoenfeld residual plots of PFS for *MGMT* status in all (A) *IDH*-wildtype (B), *IDH*-mutant/non-codeleted (C), and *IDH*-mutant/codeleted (D) tumors.

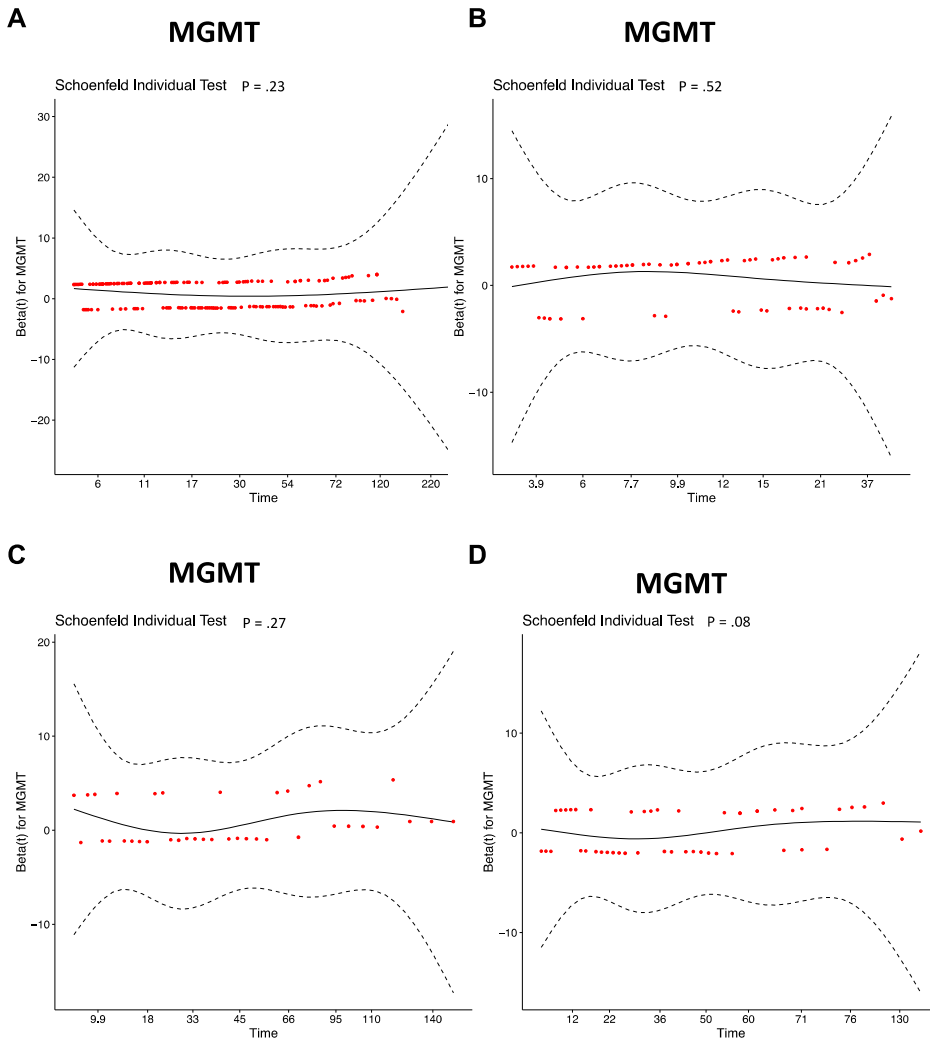

eFigure 4. Schoenfeld residual plots of PFS for variables that violated the proportional hazards assumption in all (A) *IDH*-wildtype (B), and *IDH*-mutant/non-codeleted (C) tumors.

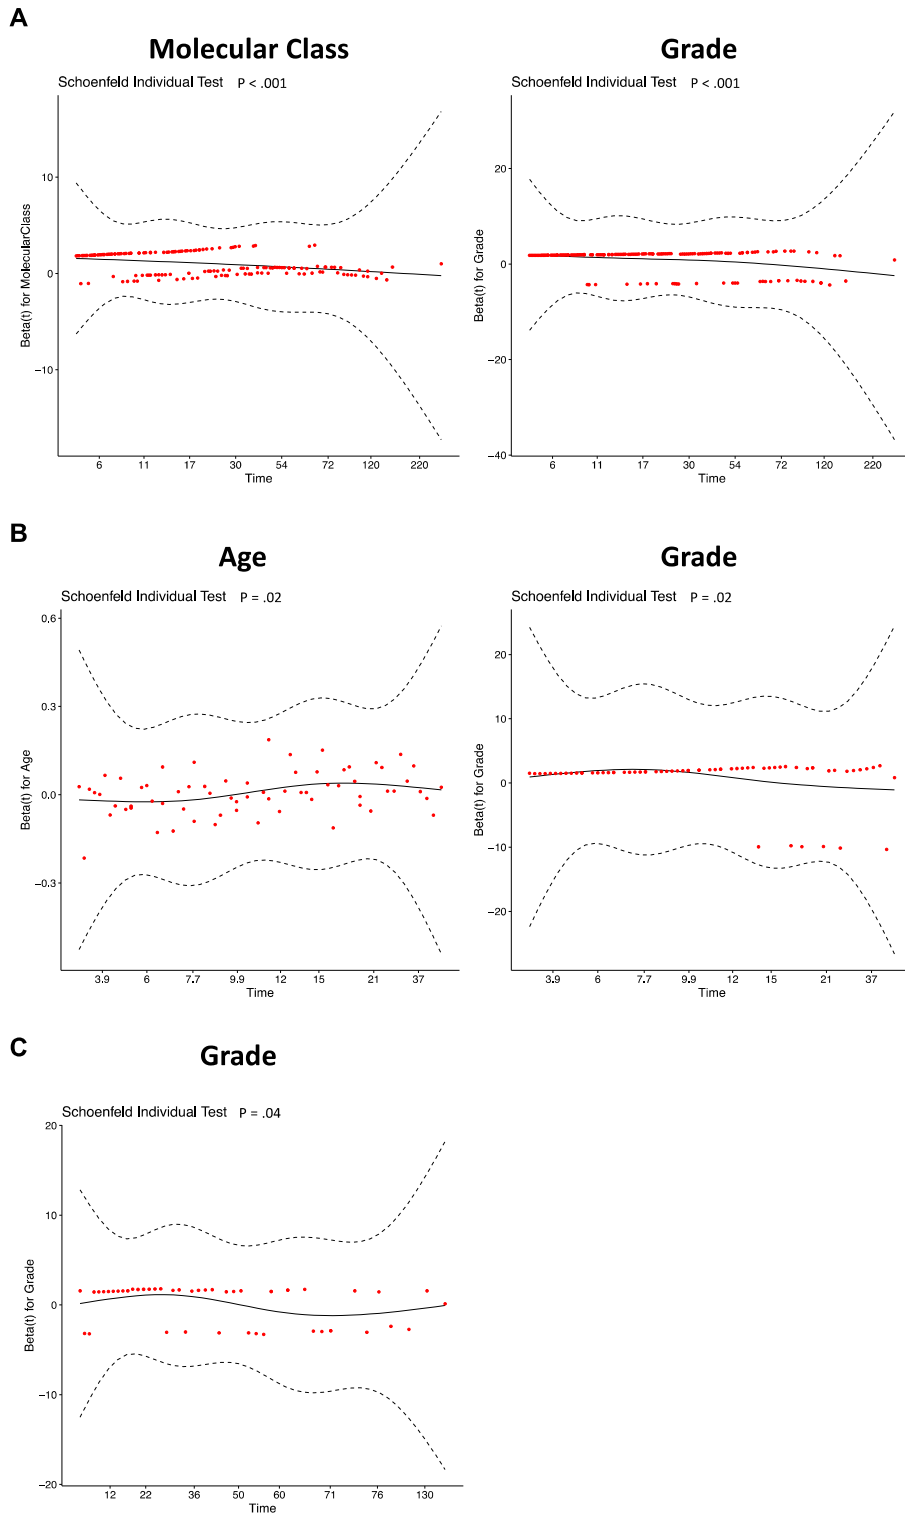



eFigure 5. Kaplan-Meier curves for progression-free survival based on *MGMT* promoter status in patients with *IDH*-wildtype tumors stratified by age and grade (A) and *IDH*-mutant/non-codeleted tumors stratified by grade (B).

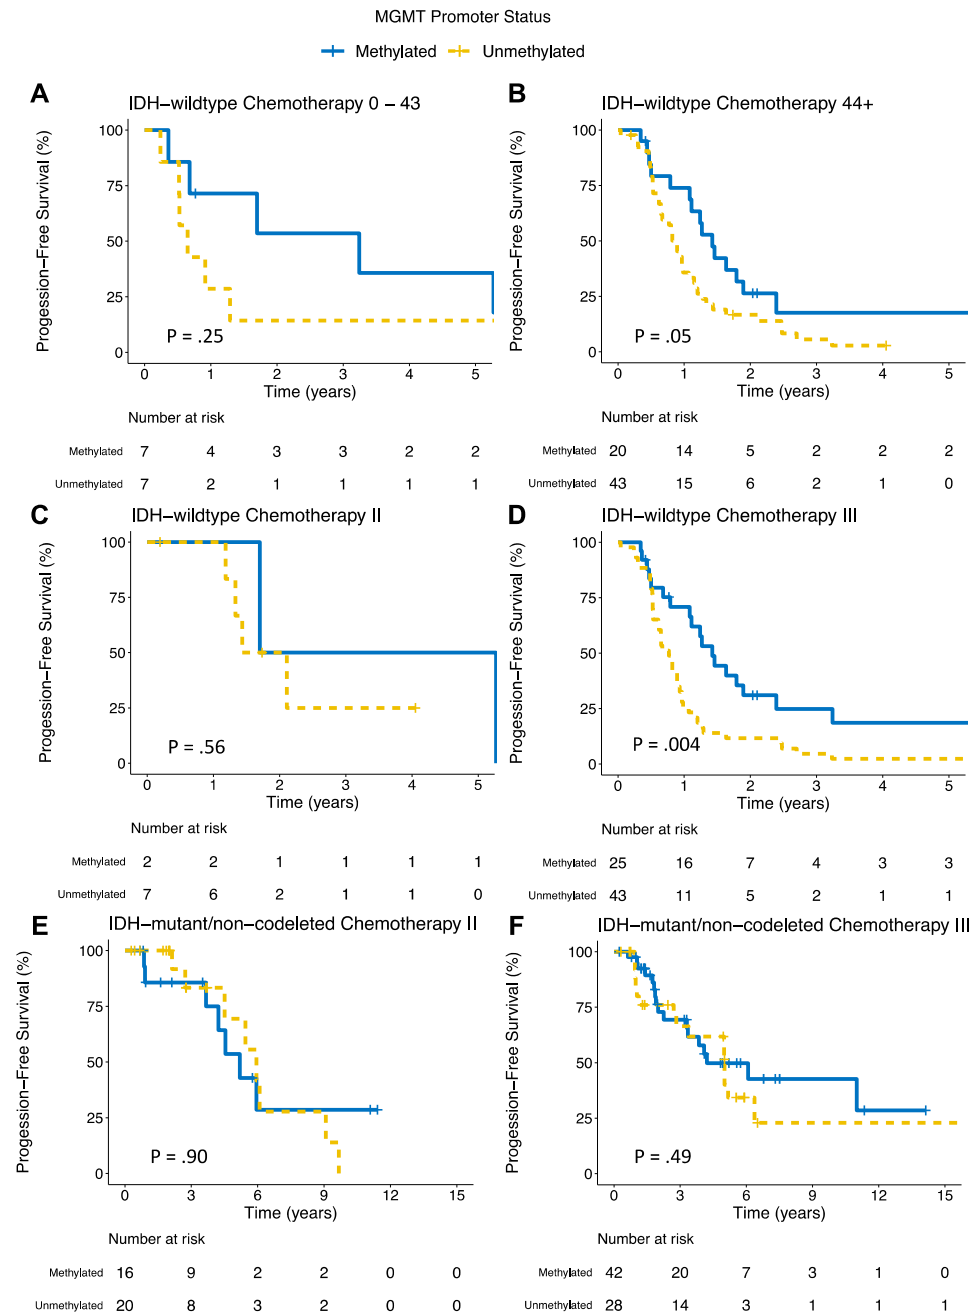

eFigure 6. Schoenfeld residual plots of OS for *MGMT* status in all (A) *IDH*-wildtype (B), *IDH*-mutant/non-codeleted (C), and *IDH*-mutant/codeleted (D) tumors.

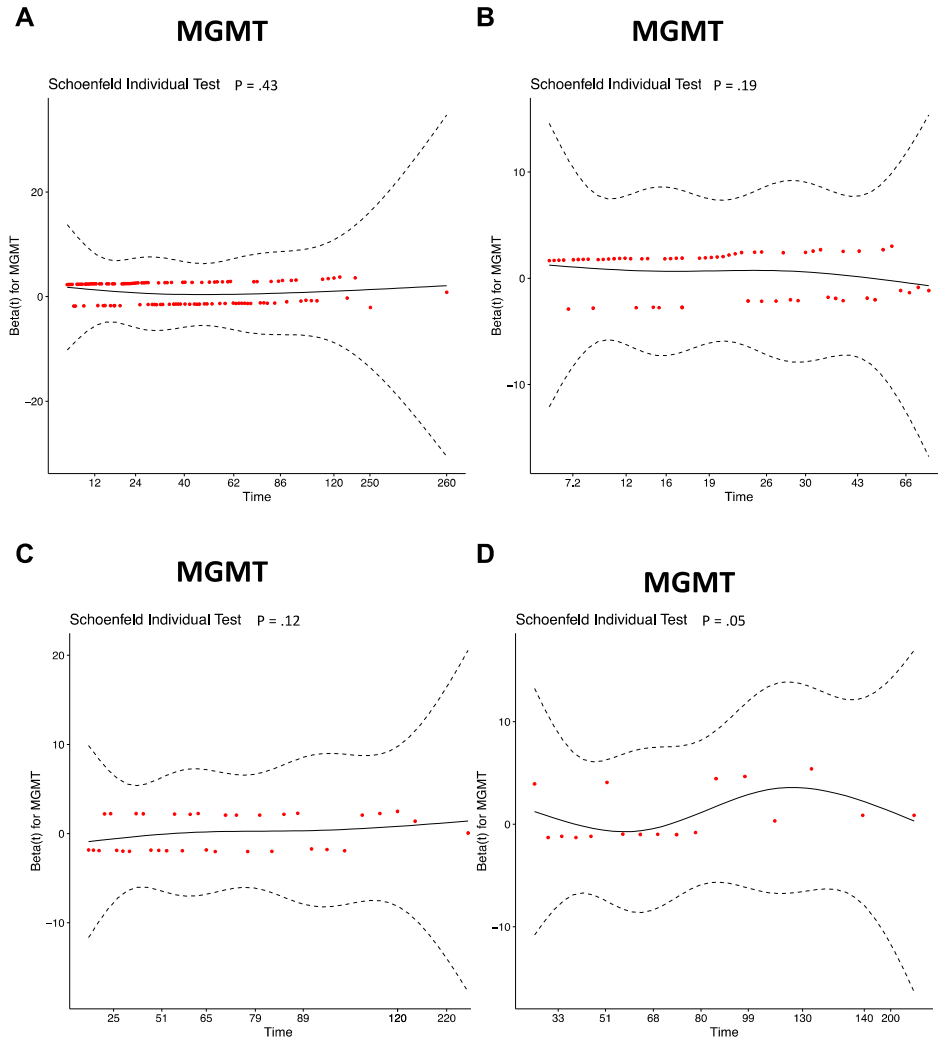

eFigure 7. Schoenfeld residual plots of OS for variables that violated the proportional hazards assumption in all tumors.

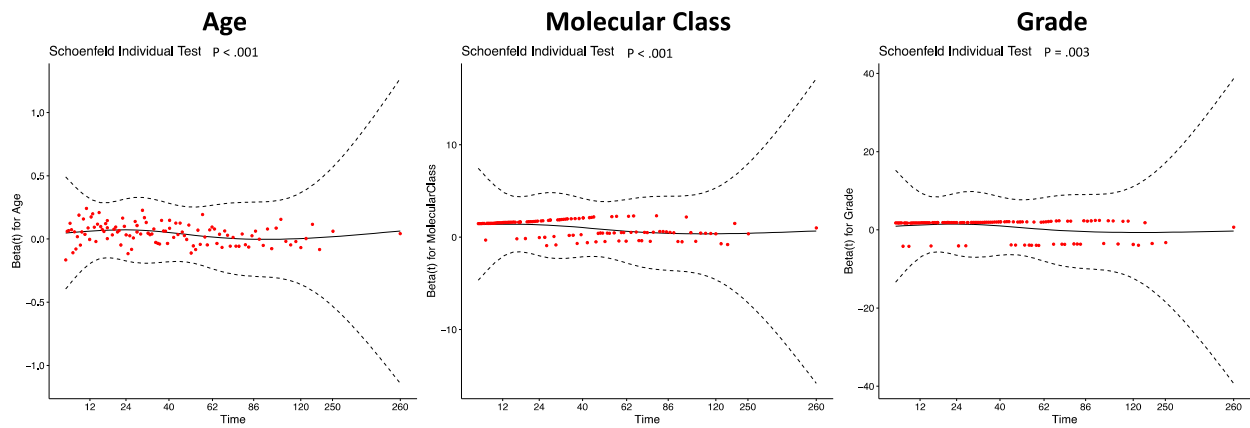

eFigure 8. Kaplan-Meier curves based on MGMT promoter status for progression-free survival (A, B) and overall survival (C, D) in patients with *IDH*-wildtype or *IDH*-mutant/codeleted tumors in the EORTC/CUIMC cohorts.

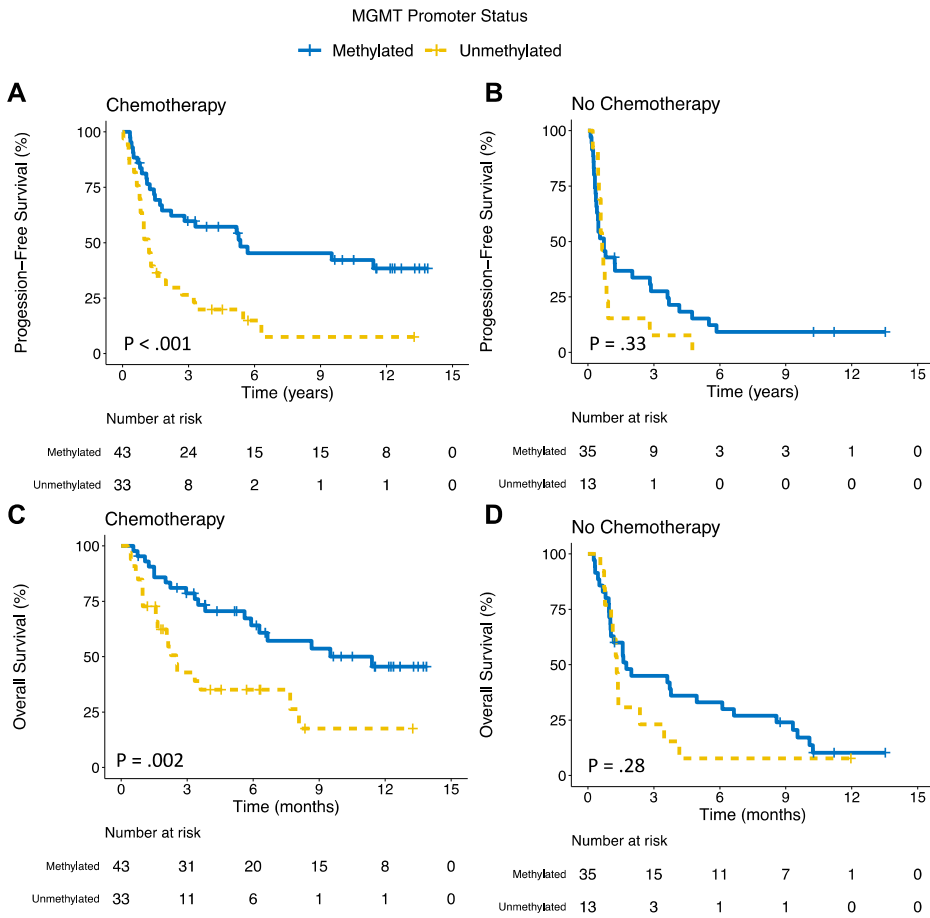

Supplement: jamaoncol-e230990-s001.pdf [file jamaoncol-e230990-s001.pdf]
