# Supplementary material
Source: PubMed Central journal article supplement (PMC10196932)
Supplement: jamaoncol-e230990-s002.pdf [file jamaoncol-e230990-s002.pdf]

## **Data Sharing Statement**

Kinslow. Association of MGMT Promotor Methylation With Survival in Low-Grade and Anaplastic Gliomas After Alkylating Chemotherapy. *JAMA Oncol.* Published May 18, 2023. doi:10.1001/jamaoncol.2023.0990

### **Data**

**Data available:** No

### **Additional Information**

**Explanation for why data not available:** IRB protected
